# Supplementary material for: Geographic and intra‐racial disparities in early‐onset colorectal cancer in the SEER 18 registries of the United States
Source: PubMed Central journal article supplement (PMC7724480; doi:10.1002/cam4.3488), 2020-10-22
Supplement: CAM4-9-9150-s002.pdf [file CAM4-9-9150-s002.pdf]

## Supplemental Figure 2. 2000 - 2015 Colorectal Cancer Incidence Rates in 5 Year Age Blocks in Metropolitan VS. Nonmetropolitan Areas in Blacks in U.S. SEER<sup>^</sup> 18, Age 30 - 60

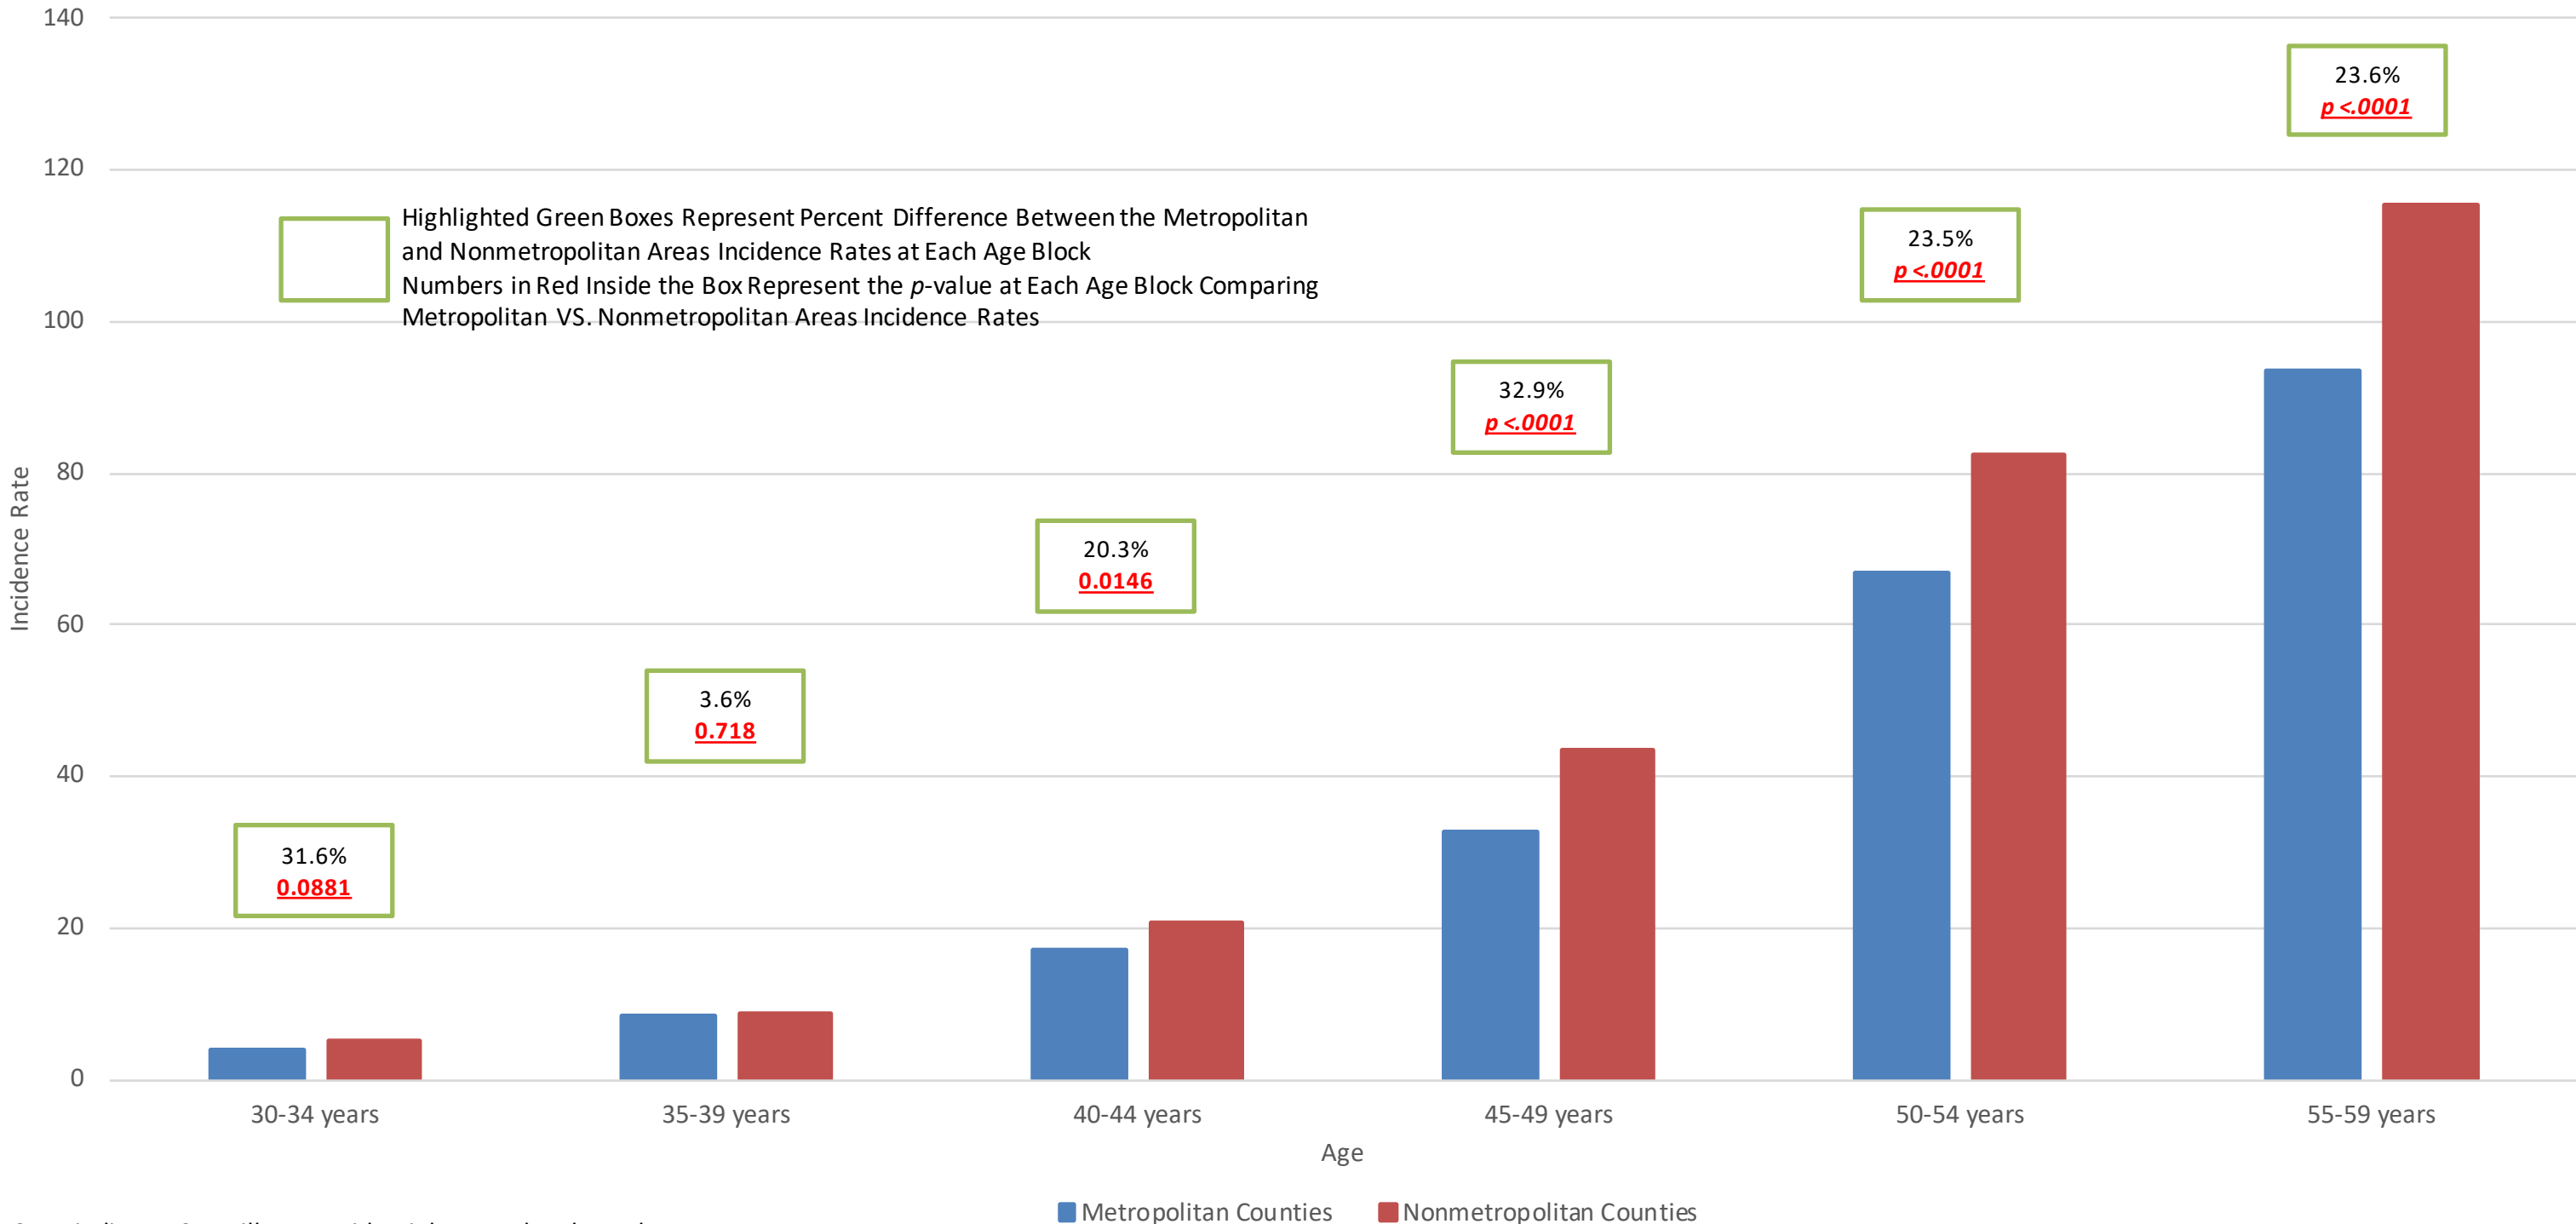

<sup>^</sup>SEER indicates Surveillance, Epidemiology, and End Results program
