# Supplementary material for: Geographic and intra‐racial disparities in early‐onset colorectal cancer in the SEER 18 registries of the United States
Source: PubMed Central journal article supplement (PMC7724480; doi:10.1002/cam4.3488), 2020-10-22
Supplement: CAM4-9-9150-s005.pdf [file CAM4-9-9150-s005.pdf]

Supplemental Spreadsheet 1. Early-Onset Colorectal Cancer Incidence Rates Stratified by U.S. Regions in One Year Age Increments

| Age       | 30   | 30  | 30       | 30       | 30    | 30         | 30             | 30             | 30            | 30         |
|-----------|------|-----|----------|----------|-------|------------|----------------|----------------|---------------|------------|
|           | Rate | SE  | Lower CI | Upper CI | Count | Rate Ratio | Ratio Lower CI | Ratio Upper CI | Ratio P-Value | Pop        |
| US 18     | 2.8  | 0.1 | 2.6      | 3.1      | 538   |            |                |                |               | 18,911,541 |
| West      | 2.7  | 0.2 | 2.4      | 3.1      | 300   | 0.9579     | 0.8289         | 1.1052         | 0.5758        | 11,009,415 |
| Northeast | 2.8  | 0.3 | 2.2      | 3.6      | 72    | 1.0018     | 0.7722         | 1.283          | 1             | 2,526,451  |
| South     | 3.1  | 0.3 | 2.6      | 3.7      | 122   | 1.0827     | 0.8821         | 1.3202         | 0.4555        | 3,960,889  |
| Midwest   | 3.1  | 0.5 | 2.3      | 4.2      | 44    | 1.0932     | 0.785          | 1.4879         | 0.6136        | 1,414,786  |
|           |      |     |          |          |       |            |                |                |               |            |
| Age       | 31   | 31  | 31       | 31       | 31    | 31         | 31             | 31             | 31            | 31         |
|           | Rate | SE  | Lower CI | Upper CI | Count | Rate Ratio | Ratio Lower CI | Ratio Upper CI | Ratio P-Value | Pop        |
| US 18     | 3.3  | 0.1 | 3.1      | 3.6      | 624   |            |                |                |               | 18,714,968 |
| West      | 3.1  | 0.2 | 2.8      | 3.5      | 337   | 0.935      | 0.8165         | 1.0691         | 0.3365        | 10,810,249 |
| Northeast | 3.5  | 0.4 | 2.8      | 4.3      | 89    | 1.0569     | 0.8367         | 1.3216         | 0.658         | 2,525,513  |
| South     | 3.9  | 0.3 | 3.3      | 4.6      | 156   | 1.1828     | 0.986          | 1.4118         | 0.0705        | 3,955,579  |
| Midwest   | 3    | 0.5 | 2.1      | 4        | 42    | 0.8848     | 0.6313         | 1.2101         | 0.4957        | 1,423,627  |
|           |      |     |          |          |       |            |                |                |               |            |
| Age       | 32   | 32  | 32       | 32       | 32    | 32         | 32             | 32             | 32            | 32         |
|           | Rate | SE  | Lower CI | Upper CI | Count | Rate Ratio | Ratio Lower CI | Ratio Upper CI | Ratio P-Value | Pop        |
| US 18     | 3.8  | 0.1 | 3.5      | 4.1      | 719   |            |                |                |               | 18,854,636 |
| West      | 3.5  | 0.2 | 3.2      | 3.9      | 384   | 0.9273     | 0.8171         | 1.0511         | 0.2443        | 10,859,336 |
| Northeast | 3.5  | 0.4 | 2.8      | 4.3      | 91    | 0.9281     | 0.7379         | 1.1556         | 0.5433        | 2,571,112  |
| South     | 4.9# | 0.4 | 4.3      | 5.7      | 196   | 1.29       | 1.0959         | 1.5128         | 0.0023        | 3,984,191  |
| Midwest   | 3.3  | 0.5 | 2.5      | 4.4      | 48    | 0.8741     | 0.6385         | 1.1715         | 0.4083        | 1,439,997  |
|           |      |     |          |          |       |            |                |                |               |            |
| Age       | 33   | 33  | 33       | 33       | 33    | 33         | 33             | 33             | 33            | 33         |
|           | Rate | SE  | Lower CI | Upper CI | Count | Rate Ratio | Ratio Lower CI | Ratio Upper CI | Ratio P-Value | Pop        |
| US 18     | 4.9  | 0.2 | 4.5      | 5.2      | 914   |            |                |                |               | 18,811,084 |
| West      | 4.5  | 0.2 | 4.1      | 4.9      | 488   | 0.9295     | 0.8311         | 1.0386         | 0.2013        | 10,805,177 |
| Northeast | 4.9  | 0.4 | 4.1      | 5.8      | 127   | 1.0097     | 0.832          | 1.2169         | 0.9467        | 2,588,576  |
| South     | 5.9# | 0.4 | 5.1      | 6.7      | 233   | 1.2043     | 1.0385         | 1.3921         | 0.014         | 3,981,767  |
| Midwest   | 4.6  | 0.6 | 3.6      | 5.8      | 66    | 0.9462     | 0.7256         | 1.2155         | 0.7218        | 1,435,564  |
|           |      |     |          |          |       |            |                |                |               |            |
| Age       | 34   | 34  | 34       | 34       | 34    | 34         | 34             | 34             | 34            | 34         |
|           | Rate | SE  | Lower CI | Upper CI | Count | Rate Ratio | Ratio Lower CI | Ratio Upper CI | Ratio P-Value | Pop        |
| US 18     | 5.1  | 0.2 | 4.8      | 5.4      | 954   |            |                |                |               | 18,804,219 |
| West      | 4.6  | 0.2 | 4.2      | 5        | 490   | 0.8991     | 0.8046         | 1.0036         | 0.0581        | 10,742,830 |
| Northeast | 5.2  | 0.4 | 4.4      | 6.2      | 137   | 1.0259     | 0.8513         | 1.2282         | 0.8071        | 2,632,348  |
| South     | 6.0# | 0.4 | 5.2      | 6.8      | 238   | 1.1777     | 1.0174         | 1.3588         | 0.0284        | 3,983,442  |
| Midwest   | 6.2  | 0.7 | 4.9      | 7.6      | 89    | 1.2135     | 0.9654         | 1.5092         | 0.0969        | 1,445,599  |
|           |      |     |          |          |       |            |                |                |               |            |
| Age       | 35   | 35  | 35       | 35       | 35    | 35         | 35             | 35             | 35            | 35         |
|           | Rate | SE  | Lower CI | Upper CI | Count | Rate Ratio | Ratio Lower CI | Ratio Upper CI | Ratio P-Value | Pop        |
| US 18     | 5.9  | 0.2 | 5.6      | 6.3      | 1,120 |            |                |                |               | 18,926,176 |
| West      | 5.5  | 0.2 | 5        | 5.9      | 591   | 0.9264     | 0.8371         | 1.0244         | 0.1386        | 10,779,978 |
| Northeast | 6.2  | 0.5 | 5.3      | 7.2      | 168   | 1.0504     | 0.8878         | 1.2364         | 0.5755        | 2,702,623  |
| South     | 6.8# | 0.4 | 6        | 7.7      | 273   | 1.155      | 1.0081         | 1.3195         | 0.0378        | 3,994,205  |
| Midwest   | 6.1  | 0.6 | 4.9      | 7.5      | 88    | 1.026      | 0.8163         | 1.2754         | 0.8482        | 1,449,370  |

|           |       |     |          |          |       |            |                |                |               |            |
|-----------|-------|-----|----------|----------|-------|------------|----------------|----------------|---------------|------------|
| Age       | 36    | 36  | 36       | 36       | 36    | 36         | 36             | 36             | 36            | 36         |
|           | Rate  | SE  | Lower CI | Upper CI | Count | Rate Ratio | Ratio Lower CI | Ratio Upper CI | Ratio P-Value | Pop        |
| US 18     | 6.7   | 0.2 | 6.4      | 7.1      | 1,276 |            |                |                |               | 18,944,410 |
| West      | 6.6   | 0.2 | 6.1      | 7.1      | 707   | 0.9786     | 0.8914         | 1.0737         | 0.663         | 10,725,933 |
| Northeast | 6.4   | 0.5 | 5.5      | 7.4      | 176   | 0.9534     | 0.8097         | 1.1169         | 0.5841        | 2,740,790  |
| South     | 7.9#  | 0.4 | 7.1      | 8.8      | 318   | 1.1761     | 1.0369         | 1.3309         | 0.0117        | 4,014,248  |
| Midwest   | 5.1#  | 0.6 | 4        | 6.4      | 75    | 0.7609     | 0.5946         | 0.9608         | 0.0202        | 1,463,439  |
| Age       | 37    | 37  | 37       | 37       | 37    | 37         | 37             | 37             | 37            | 37         |
|           | Rate  | SE  | Lower CI | Upper CI | Count | Rate Ratio | Ratio Lower CI | Ratio Upper CI | Ratio P-Value | Pop        |
| US 18     | 7.3   | 0.2 | 6.9      | 7.7      | 1,395 |            |                |                |               | 19,035,820 |
| West      | 6.5#  | 0.2 | 6.1      | 7        | 703   | 0.8933     | 0.8147         | 0.9788         | 0.0151        | 10,738,838 |
| Northeast | 8.1   | 0.5 | 7.1      | 9.2      | 226   | 1.1073     | 0.9578         | 1.2753         | 0.1685        | 2,785,076  |
| South     | 8.8#  | 0.5 | 7.9      | 9.8      | 356   | 1.2034     | 1.0682         | 1.3529         | 0.0024        | 4,036,843  |
| Midwest   | 7.5   | 0.7 | 6.1      | 9        | 110   | 1.0176     | 0.8303         | 1.2363         | 0.8884        | 1,475,063  |
| Age       | 38    | 38  | 38       | 38       | 38    | 38         | 38             | 38             | 38            | 38         |
|           | Rate  | SE  | Lower CI | Upper CI | Count | Rate Ratio | Ratio Lower CI | Ratio Upper CI | Ratio P-Value | Pop        |
| US 18     | 8.9   | 0.2 | 8.5      | 9.3      | 1,706 |            |                |                |               | 19,161,807 |
| West      | 8.1#  | 0.3 | 7.6      | 8.7      | 872   | 0.9099     | 0.8376         | 0.9878         | 0.024         | 10,764,429 |
| Northeast | 9.5   | 0.6 | 8.4      | 10.7     | 269   | 1.0661     | 0.934          | 1.2131         | 0.3454        | 2,834,041  |
| South     | 10.6# | 0.5 | 9.6      | 11.7     | 432   | 1.1928     | 1.0708         | 1.3264         | 0.0014        | 4,068,035  |
| Midwest   | 8.9   | 0.8 | 7.4      | 10.5     | 133   | 0.999      | 0.831          | 1.1924         | 1             | 1,495,302  |
| Age       | 39    | 39  | 39       | 39       | 39    | 39         | 39             | 39             | 39            | 39         |
|           | Rate  | SE  | Lower CI | Upper CI | Count | Rate Ratio | Ratio Lower CI | Ratio Upper CI | Ratio P-Value | Pop        |
| US 18     | 10.2  | 0.2 | 9.8      | 10.7     | 1,977 |            |                |                |               | 19,309,878 |
| West      | 9.4#  | 0.3 | 8.9      | 10       | 1,019 | 0.9211     | 0.8533         | 0.994          | 0.0342        | 10,804,808 |
| Northeast | 10.5  | 0.6 | 9.4      | 11.8     | 304   | 1.0279     | 0.9079         | 1.1603         | 0.6736        | 2,888,787  |
| South     | 12.1# | 0.5 | 11.1     | 13.2     | 497   | 1.184      | 1.071          | 1.3071         | 0.001         | 4,099,822  |
| Midwest   | 10.4  | 0.8 | 8.8      | 12.1     | 157   | 1.0112     | 0.854          | 1.1902         | 0.9167        | 1,516,461  |
| Age       | 40    | 40  | 40       | 40       | 40    | 40         | 40             | 40             | 40            | 40         |
|           | Rate  | SE  | Lower CI | Upper CI | Count | Rate Ratio | Ratio Lower CI | Ratio Upper CI | Ratio P-Value | Pop        |
| US 18     | 11.8  | 0.2 | 11.3     | 12.3     | 2,301 |            |                |                |               | 19,493,038 |
| West      | 10.6# | 0.3 | 10       | 11.2     | 1,147 | 0.894      | 0.8321         | 0.96           | 0.0019        | 10,869,262 |
| Northeast | 11.8  | 0.6 | 10.6     | 13.1     | 347   | 0.9981     | 0.889          | 1.1179         | 1             | 2,945,154  |
| South     | 14.5# | 0.6 | 13.3     | 15.7     | 597   | 1.2244     | 1.1171         | 1.3403         | 0             | 4,130,644  |
| Midwest   | 13.6  | 0.9 | 11.8     | 15.5     | 210   | 1.1493     | 0.993          | 1.3242         | 0.0619        | 1,547,978  |
| Age       | 41    | 41  | 41       | 41       | 41    | 41         | 41             | 41             | 41            | 41         |
|           | Rate  | SE  | Lower CI | Upper CI | Count | Rate Ratio | Ratio Lower CI | Ratio Upper CI | Ratio P-Value | Pop        |
| US 18     | 13.2  | 0.3 | 12.7     | 13.7     | 2,583 |            |                |                |               | 19,612,049 |
| West      | 12.1# | 0.3 | 11.5     | 12.8     | 1,319 | 0.9207     | 0.8609         | 0.9842         | 0.0149        | 10,877,856 |
| Northeast | 13    | 0.7 | 11.8     | 14.4     | 391   | 0.9907     | 0.8885         | 1.1023         | 0.8902        | 2,996,534  |
| South     | 16.2# | 0.6 | 15       | 17.5     | 677   | 1.2332     | 1.1315         | 1.3427         | 0             | 4,168,169  |
| Midwest   | 12.5  | 0.9 | 10.8     | 14.4     | 196   | 0.9482     | 0.8158         | 1.0968         | 0.4988        | 1,569,490  |

|           |       |     |          |          |       |            |                |                |               |            |
|-----------|-------|-----|----------|----------|-------|------------|----------------|----------------|---------------|------------|
| Age       | 42    | 42  | 42       | 42       | 42    | 42         | 42             | 42             | 42            | 42         |
|           | Rate  | SE  | Lower CI | Upper CI | Count | Rate Ratio | Ratio Lower CI | Ratio Upper CI | Ratio P-Value | Pop        |
| US 18     | 14.5  | 0.3 | 14       | 15       | 2,858 |            |                |                |               | 19,717,232 |
| West      | 13.3# | 0.3 | 12.6     | 14       | 1,449 | 0.9186     | 0.8617         | 0.9789         | 0.0086        | 10,882,425 |
| Northeast | 14    | 0.7 | 12.7     | 15.4     | 427   | 0.969      | 0.8732         | 1.0731         | 0.5635        | 3,040,183  |
| South     | 17.3# | 0.6 | 16       | 18.6     | 725   | 1.1916     | 1.0968         | 1.2932         | 0             | 4,197,555  |
| Midwest   | 16.1  | 1   | 14.2     | 18.2     | 257   | 1.1102     | 0.9733         | 1.2617         | 0.1192        | 1,597,069  |
|           |       |     |          |          |       |            |                |                |               |            |
| Age       | 43    | 43  | 43       | 43       | 43    | 43         | 43             | 43             | 43            | 43         |
|           | Rate  | SE  | Lower CI | Upper CI | Count | Rate Ratio | Ratio Lower CI | Ratio Upper CI | Ratio P-Value | Pop        |
| US 18     | 16.7  | 0.3 | 16.2     | 17.3     | 3,316 |            |                |                |               | 19,828,459 |
| West      | 15.0# | 0.4 | 14.3     | 15.8     | 1,641 | 0.8987     | 0.8466         | 0.9538         | 0.0004        | 10,918,361 |
| Northeast | 17.9  | 0.8 | 16.4     | 19.4     | 549   | 1.0683     | 0.9743         | 1.1696         | 0.1601        | 3,072,981  |
| South     | 20.1# | 0.7 | 18.8     | 21.5     | 849   | 1.2043     | 1.1156         | 1.299          | 0             | 4,215,429  |
| Midwest   | 17.1  | 1   | 15.1     | 19.2     | 277   | 1.0214     | 0.9003         | 1.1549         | 0.753         | 1,621,688  |
|           |       |     |          |          |       |            |                |                |               |            |
| Age       | 44    | 44  | 44       | 44       | 44    | 44         | 44             | 44             | 44            | 44         |
|           | Rate  | SE  | Lower CI | Upper CI | Count | Rate Ratio | Ratio Lower CI | Ratio Upper CI | Ratio P-Value | Pop        |
| US 18     | 18.9  | 0.3 | 18.3     | 19.5     | 3,733 |            |                |                |               | 19,761,829 |
| West      | 17.2# | 0.4 | 16.4     | 18       | 1,864 | 0.9093     | 0.8597         | 0.9615         | 0.0008        | 10,852,136 |
| Northeast | 19.7  | 0.8 | 18.2     | 21.4     | 608   | 1.0444     | 0.957          | 1.1382         | 0.3312        | 3,081,795  |
| South     | 22.5# | 0.7 | 21.1     | 24       | 943   | 1.1897     | 1.1065         | 1.2781         | 0             | 4,196,068  |
| Midwest   | 19.5  | 1.1 | 17.4     | 21.8     | 318   | 1.0316     | 0.9171         | 1.1571         | 0.6103        | 1,631,830  |
|           |       |     |          |          |       |            |                |                |               |            |
| Age       | 45    | 45  | 45       | 45       | 45    | 45         | 45             | 45             | 45            | 45         |
|           | Rate  | SE  | Lower CI | Upper CI | Count | Rate Ratio | Ratio Lower CI | Ratio Upper CI | Ratio P-Value | Pop        |
| US 18     | 21.8  | 0.3 | 21.1     | 22.5     | 4,284 |            |                |                |               | 19,660,161 |
| West      | 19.7# | 0.4 | 18.8     | 20.5     | 2,121 | 0.903      | 0.8568         | 0.9515         | 0.0001        | 10,778,977 |
| Northeast | 22.7  | 0.9 | 21.1     | 24.5     | 699   | 1.044      | 0.9624         | 1.1312         | 0.301         | 3,072,688  |
| South     | 26.8# | 0.8 | 25.3     | 28.5     | 1,121 | 1.2321     | 1.1526         | 1.3161         | 0             | 4,175,502  |
| Midwest   | 21    | 1.1 | 18.8     | 23.3     | 343   | 0.9639     | 0.861          | 1.0763         | 0.5338        | 1,632,994  |
|           |       |     |          |          |       |            |                |                |               |            |
| Age       | 46    | 46  | 46       | 46       | 46    | 46         | 46             | 46             | 46            | 46         |
|           | Rate  | SE  | Lower CI | Upper CI | Count | Rate Ratio | Ratio Lower CI | Ratio Upper CI | Ratio P-Value | Pop        |
| US 18     | 25.1  | 0.4 | 24.4     | 25.8     | 4,901 |            |                |                |               | 19,553,725 |
| West      | 22.8# | 0.5 | 21.9     | 23.8     | 2,442 | 0.9113     | 0.8677         | 0.9568         | 0.0002        | 10,691,465 |
| Northeast | 25.8  | 0.9 | 24       | 27.6     | 790   | 1.0278     | 0.9522         | 1.1083         | 0.4843        | 3,066,515  |
| South     | 30.2# | 0.9 | 28.6     | 32       | 1,258 | 1.2062     | 1.1329         | 1.2836         | 0             | 4,161,026  |
| Midwest   | 25.1  | 1.2 | 22.8     | 27.7     | 411   | 1.0031     | 0.9048         | 1.1095         | 0.9667        | 1,634,719  |
|           |       |     |          |          |       |            |                |                |               |            |
| Age       | 47    | 47  | 47       | 47       | 47    | 47         | 47             | 47             | 47            | 47         |
|           | Rate  | SE  | Lower CI | Upper CI | Count | Rate Ratio | Ratio Lower CI | Ratio Upper CI | Ratio P-Value | Pop        |
| US 18     | 27.5  | 0.4 | 26.7     | 28.2     | 5,341 |            |                |                |               | 19,457,148 |
| West      | 25.2# | 0.5 | 24.3     | 26.2     | 2,678 | 0.9193     | 0.8773         | 0.9632         | 0.0004        | 10,612,011 |
| Northeast | 27.5  | 0.9 | 25.7     | 29.5     | 842   | 1.0031     | 0.9317         | 1.0789         | 0.9451        | 3,057,976  |
| South     | 32.5# | 0.9 | 30.8     | 34.2     | 1,347 | 1.1828     | 1.1134         | 1.2559         | 0             | 4,148,773  |
| Midwest   | 28.9  | 1.3 | 26.4     | 31.7     | 474   | 1.0539     | 0.9574         | 1.158          | 0.2842        | 1,638,388  |

|           |       |     |          |          |       |            |                |                |               |            |
|-----------|-------|-----|----------|----------|-------|------------|----------------|----------------|---------------|------------|
| Age       | 48    | 48  | 48       | 48       | 48    | 48         | 48             | 48             | 48            | 48         |
|           | Rate  | SE  | Lower CI | Upper CI | Count | Rate Ratio | Ratio Lower CI | Ratio Upper CI | Ratio P-Value | Pop        |
| US 18     | 31.3  | 0.4 | 30.5     | 32.1     | 6,035 |            |                |                |               | 19,286,247 |
| West      | 28.4# | 0.5 | 27.4     | 29.5     | 2,983 | 0.9088     | 0.8695         | 0.9497         | 0             | 10,489,727 |
| Northeast | 32.4  | 1   | 30.4     | 34.4     | 980   | 1.034      | 0.9655         | 1.1064         | 0.3402        | 3,028,850  |
| South     | 37.3# | 1   | 35.4     | 39.2     | 1,538 | 1.1913     | 1.1257         | 1.2601         | 0             | 4,125,808  |
| Midwest   | 32.5  | 1.4 | 29.8     | 35.4     | 534   | 1.0394     | 0.9496         | 1.1357         | 0.4039        | 1,641,862  |
|           |       |     |          |          |       |            |                |                |               |            |
| Age       | 49    | 49  | 49       | 49       | 49    | 49         | 49             | 49             | 49            | 49         |
|           | Rate  | SE  | Lower CI | Upper CI | Count | Rate Ratio | Ratio Lower CI | Ratio Upper CI | Ratio P-Value | Pop        |
| US 18     | 34.9  | 0.4 | 34.1     | 35.8     | 6,689 |            |                |                |               | 19,163,643 |
| West      | 32.0# | 0.6 | 31       | 33.1     | 3,337 | 0.9177     | 0.8801         | 0.9567         | 0             | 10,418,016 |
| Northeast | 34.3  | 1.1 | 32.3     | 36.5     | 1,033 | 0.984      | 0.9207         | 1.0508         | 0.6438        | 3,007,577  |
| South     | 43.1# | 1   | 41.1     | 45.1     | 1,766 | 1.2343     | 1.1706         | 1.3009         | 0             | 4,099,140  |
| Midwest   | 33.7  | 1.4 | 31       | 36.7     | 553   | 0.9667     | 0.8848         | 1.0544         | 0.4586        | 1,638,910  |
|           |       |     |          |          |       |            |                |                |               |            |
| Age       | 50    | 50  | 50       | 50       | 50    | 50         | 50             | 50             | 50            | 50         |
|           | Rate  | SE  | Lower CI | Upper CI | Count | Rate Ratio | Ratio Lower CI | Ratio Upper CI | Ratio P-Value | Pop        |
| US 18     | 51    | 0.5 | 50       | 52.1     | 9,654 |            |                |                |               | 18,918,753 |
| West      | 47.3# | 0.7 | 46       | 48.7     | 4,866 | 0.9271     | 0.8955         | 0.9597         | 0             | 10,285,607 |
| Northeast | 53.5  | 1.3 | 50.9     | 56.2     | 1,580 | 1.0476     | 0.9927         | 1.105          | 0.0902        | 2,955,541  |
| South     | 58.4# | 1.2 | 56.1     | 60.8     | 2,365 | 1.1447     | 1.0939         | 1.1975         | 0             | 4,048,850  |
| Midwest   | 51.8  | 1.8 | 48.3     | 55.4     | 843   | 1.0143     | 0.9442         | 1.0884         | 0.7032        | 1,628,755  |
|           |       |     |          |          |       |            |                |                |               |            |
| Age       | 51    | 51  | 51       | 51       | 51    | 51         | 51             | 51             | 51            | 51         |
|           | Rate  | SE  | Lower CI | Upper CI | Count | Rate Ratio | Ratio Lower CI | Ratio Upper CI | Ratio P-Value | Pop        |
| US 18     | 51.5  | 0.5 | 50.5     | 52.6     | 9,639 |            |                |                |               | 18,700,852 |
| West      | 48.0# | 0.7 | 46.7     | 49.4     | 4,874 | 0.9311     | 0.8994         | 0.9639         | 0             | 10,155,449 |
| Northeast | 52.2  | 1.3 | 49.6     | 54.9     | 1,524 | 1.0121     | 0.9583         | 1.0684         | 0.6703        | 2,921,362  |
| South     | 60.2# | 1.2 | 57.9     | 62.7     | 2,413 | 1.1688     | 1.1174         | 1.2223         | 0             | 4,005,249  |
| Midwest   | 51.1  | 1.8 | 47.7     | 54.8     | 828   | 0.9924     | 0.9233         | 1.0655         | 0.8502        | 1,618,792  |
|           |       |     |          |          |       |            |                |                |               |            |
| Age       | 52    | 52  | 52       | 52       | 52    | 52         | 52             | 52             | 52            | 52         |
|           | Rate  | SE  | Lower CI | Upper CI | Count | Rate Ratio | Ratio Lower CI | Ratio Upper CI | Ratio P-Value | Pop        |
| US 18     | 50.6  | 0.5 | 49.5     | 51.6     | 9,267 |            |                |                |               | 18,326,266 |
| West      | 46.4# | 0.7 | 45.1     | 47.8     | 4,614 | 0.9177     | 0.8856         | 0.9507         | 0             | 9,943,381  |
| Northeast | 51    | 1.3 | 48.5     | 53.7     | 1,460 | 1.0095     | 0.9547         | 1.0669         | 0.7451        | 2,860,076  |
| South     | 60.8# | 1.2 | 58.4     | 63.3     | 2,385 | 1.2017     | 1.1483         | 1.2571         | 0             | 3,924,986  |
| Midwest   | 50.6  | 1.8 | 47.1     | 54.2     | 808   | 1          | 0.9295         | 1.0747         | 1             | 1,597,823  |
|           |       |     |          |          |       |            |                |                |               |            |
| Age       | 53    | 53  | 53       | 53       | 53    | 53         | 53             | 53             | 53            | 53         |
|           | Rate  | SE  | Lower CI | Upper CI | Count | Rate Ratio | Ratio Lower CI | Ratio Upper CI | Ratio P-Value | Pop        |
| US 18     | 53.8  | 0.5 | 52.7     | 54.9     | 9,721 |            |                |                |               | 18,073,808 |
| West      | 48.8# | 0.7 | 47.4     | 50.2     | 4,771 | 0.9066     | 0.8756         | 0.9387         | 0             | 9,784,106  |
| Northeast | 55.7  | 1.4 | 53       | 58.5     | 1,575 | 1.0359     | 0.9816         | 1.0926         | 0.1999        | 2,826,914  |
| South     | 65.3# | 1.3 | 62.8     | 67.9     | 2,536 | 1.2149     | 1.1625         | 1.2693         | 0             | 3,880,980  |
| Midwest   | 53    | 1.8 | 49.5     | 56.8     | 839   | 0.9862     | 0.9179         | 1.0583         | 0.715         | 1,581,808  |

|           |       |     |          |          |        |            |                |                |               |            |
|-----------|-------|-----|----------|----------|--------|------------|----------------|----------------|---------------|------------|
| Age       | 54    | 54  | 54       | 54       | 54     | 54         | 54             | 54             | 54            | 54         |
|           | Rate  | SE  | Lower CI | Upper CI | Count  | Rate Ratio | Ratio Lower CI | Ratio Upper CI | Ratio P-Value | Pop        |
| US 18     | 58.2  | 0.6 | 57.1     | 59.4     | 10,245 |            |                |                |               | 17,590,040 |
| West      | 53.5# | 0.7 | 52.1     | 55       | 5,096  | 0.9188     | 0.8883         | 0.9503         | 0             | 9,522,847  |
| Northeast | 56.8  | 1.4 | 54       | 59.7     | 1,562  | 0.9751     | 0.924          | 1.0286         | 0.3615        | 2,750,208  |
| South     | 72.7# | 1.4 | 70       | 75.4     | 2,742  | 1.2475     | 1.1956         | 1.3013         | 0             | 3,773,798  |
| Midwest   | 54.8  | 1.9 | 51.1     | 58.6     | 845    | 0.9401     | 0.8754         | 1.0086         | 0.086         | 1,543,187  |
| Age       | 55    | 55  | 55       | 55       | 55     | 55         | 55             | 55             | 55            | 55         |
|           | Rate  | SE  | Lower CI | Upper CI | Count  | Rate Ratio | Ratio Lower CI | Ratio Upper CI | Ratio P-Value | Pop        |
| US 18     | 62.1  | 0.6 | 60.9     | 63.3     | 10,538 |            |                |                |               | 16,965,058 |
| West      | 55.1# | 0.8 | 53.6     | 56.6     | 5,054  | 0.8864     | 0.857          | 0.9167         | 0             | 9,179,008  |
| Northeast | 64.2  | 1.6 | 61.1     | 67.3     | 1,700  | 1.0329     | 0.9807         | 1.0873         | 0.2216        | 2,649,749  |
| South     | 76.9# | 1.5 | 74.1     | 79.8     | 2,804  | 1.2382     | 1.1872         | 1.2909         | 0             | 3,645,868  |
| Midwest   | 65.8  | 2.1 | 61.7     | 70       | 980    | 1.0585     | 0.9905         | 1.1303         | 0.0933        | 1,490,433  |
| Age       | 56    | 56  | 56       | 56       | 56     | 56         | 56             | 56             | 56            | 56         |
|           | Rate  | SE  | Lower CI | Upper CI | Count  | Rate Ratio | Ratio Lower CI | Ratio Upper CI | Ratio P-Value | Pop        |
| US 18     | 66.4  | 0.6 | 65.2     | 67.7     | 10,903 |            |                |                |               | 16,416,007 |
| West      | 60.2# | 0.8 | 58.6     | 61.8     | 5,340  | 0.9062     | 0.8768         | 0.9364         | 0             | 8,872,754  |
| Northeast | 68.6  | 1.6 | 65.4     | 71.9     | 1,757  | 1.0332     | 0.9819         | 1.0867         | 0.2096        | 2,560,480  |
| South     | 80.3# | 1.5 | 77.3     | 83.3     | 2,840  | 1.2084     | 1.1591         | 1.2594         | 0             | 3,538,637  |
| Midwest   | 66.9  | 2.2 | 62.7     | 71.2     | 966    | 1.0071     | 0.942          | 1.0757         | 0.8417        | 1,444,136  |
| Age       | 57    | 57  | 57       | 57       | 57     | 57         | 57             | 57             | 57            | 57         |
|           | Rate  | SE  | Lower CI | Upper CI | Count  | Rate Ratio | Ratio Lower CI | Ratio Upper CI | Ratio P-Value | Pop        |
| US 18     | 70.8  | 0.7 | 69.5     | 72.2     | 11,238 |            |                |                |               | 15,862,397 |
| West      | 63.7# | 0.9 | 62       | 65.4     | 5,453  | 0.8989     | 0.8701         | 0.9285         | 0             | 8,562,584  |
| Northeast | 72.5  | 1.7 | 69.2     | 75.9     | 1,798  | 1.0231     | 0.9729         | 1.0754         | 0.3754        | 2,480,609  |
| South     | 87.2# | 1.6 | 84.1     | 90.4     | 2,982  | 1.2305     | 1.1814         | 1.2813         | 0             | 3,420,645  |
| Midwest   | 71.9  | 2.3 | 67.5     | 76.4     | 1,005  | 1.0143     | 0.95           | 1.082          | 0.6756        | 1,398,559  |
| Age       | 58    | 58  | 58       | 58       | 58     | 58         | 58             | 58             | 58            | 58         |
|           | Rate  | SE  | Lower CI | Upper CI | Count  | Rate Ratio | Ratio Lower CI | Ratio Upper CI | Ratio P-Value | Pop        |
| US 18     | 75.6  | 0.7 | 74.2     | 77       | 11,525 |            |                |                |               | 15,244,402 |
| West      | 67.7# | 0.9 | 65.9     | 69.5     | 5,560  | 0.8954     | 0.867          | 0.9246         | 0             | 8,213,620  |
| Northeast | 78.3  | 1.8 | 74.8     | 81.9     | 1,865  | 1.0354     | 0.9854         | 1.0874         | 0.1681        | 2,382,539  |
| South     | 92.6# | 1.7 | 89.4     | 96       | 3,059  | 1.2253     | 1.177          | 1.2753         | 0             | 3,302,189  |
| Midwest   | 77.3  | 2.4 | 72.7     | 82.2     | 1,041  | 1.023      | 0.9592         | 1.0901         | 0.4918        | 1,346,054  |
| Age       | 59    | 59  | 59       | 59       | 59     | 59         | 59             | 59             | 59            | 59         |
|           | Rate  | SE  | Lower CI | Upper CI | Count  | Rate Ratio | Ratio Lower CI | Ratio Upper CI | Ratio P-Value | Pop        |
| US 18     | 82.3  | 0.8 | 80.8     | 83.8     | 11,991 |            |                |                |               | 14,571,936 |
| West      | 75.2# | 1   | 73.2     | 77.1     | 5,896  | 0.9133     | 0.8851         | 0.9423         | 0             | 7,845,622  |
| Northeast | 84.2  | 1.9 | 80.5     | 88.1     | 1,914  | 1.0233     | 0.9746         | 1.074          | 0.3549        | 2,272,934  |
| South     | 98.0# | 1.8 | 94.6     | 101.6    | 3,104  | 1.1915     | 1.145          | 1.2396         | 0             | 3,165,892  |
| Midwest   | 83.7  | 2.5 | 78.7     | 88.8     | 1,077  | 1.0166     | 0.9542         | 1.0821         | 0.6144        | 1,287,488  |

| Age                                                                                                                        | 60                                                                                                    | 60  | 60       | 60       | 60     | 60         | 60             | 60             | 60            | 60         |
|----------------------------------------------------------------------------------------------------------------------------|-------------------------------------------------------------------------------------------------------|-----|----------|----------|--------|------------|----------------|----------------|---------------|------------|
|                                                                                                                            | Rate                                                                                                  | SE  | Lower CI | Upper CI | Count  | Rate Ratio | Ratio Lower CI | Ratio Upper CI | Ratio P-Value | Pop        |
| US 18                                                                                                                      | 89.8                                                                                                  | 0.8 | 88.2     | 91.4     | 12,449 |            |                |                |               | 13,865,681 |
| West                                                                                                                       | 80.9#                                                                                                 | 1   | 78.9     | 83       | 6,036  | 0.9015     | 0.874          | 0.9297         | 0             | 7,457,773  |
| Northeast                                                                                                                  | 92.2                                                                                                  | 2.1 | 88.2     | 96.4     | 1,995  | 1.0274     | 0.9795         | 1.0772         | 0.2682        | 2,162,819  |
| South                                                                                                                      | 109.7#                                                                                                | 1.9 | 106      | 113.5    | 3,314  | 1.2221     | 1.1758         | 1.2699         | 0             | 3,020,427  |
| Midwest                                                                                                                    | 90.1                                                                                                  | 2.7 | 84.9     | 95.6     | 1,104  | 1.0041     | 0.9433         | 1.0679         | 0.9064        | 1,224,662  |
| Rates are per 100,000 and age-adjusted to the 2000 US Std Population (single ages to 84 - Census P25-1130) standard        |                                                                                                       |     |          |          |        |            |                |                |               |            |
| Confidence intervals are 95% for rates and ratios.                                                                         |                                                                                                       |     |          |          |        |            |                |                |               |            |
| #                                                                                                                          | The rate ratio indicates that the rate is significantly different than the rate for SEER 18 (p<0.05). |     |          |          |        |            |                |                |               |            |
| Warning: Use caution when interpreting ratios and related statistics as the ratio variable contains overlapping groupings. |                                                                                                       |     |          |          |        |            |                |                |               |            |
