# Supplementary material for: Geographic and intra‐racial disparities in early‐onset colorectal cancer in the SEER 18 registries of the United States
Source: PubMed Central journal article supplement (PMC7724480; doi:10.1002/cam4.3488), 2020-10-22
Supplement: CAM4-9-9150-s006.pdf [file CAM4-9-9150-s006.pdf]

Supplemental Spreadsheet 2. Early-Onset Colorectal Cancer Incidence Rates in SEER 18 Registries in One Year Age Increments

| Age                                    | 30    | 30  | 30       | 30       | 30    | 30         | 30             | 30             | 30            | 30         |
|----------------------------------------|-------|-----|----------|----------|-------|------------|----------------|----------------|---------------|------------|
|                                        | Rate  | SE  | Lower CI | Upper CI | Count | Rate Ratio | Ratio Lower CI | Ratio Upper CI | Ratio P-Value | Pop        |
| SEER 18                                | 2.8   | 0.1 | 2.6      | 3.1      | 538   |            |                |                |               | 18,911,541 |
| San Francisco-Oakland SMSA - 2000+     | 2.8   | 0.5 | 1.9      | 4        | 31    | 0.9869     | 0.6638         | 1.4176         | 1             | 1,104,194  |
| Connecticut - 2000+                    | 2.9   | 0.6 | 1.8      | 4.5      | 20    | 1.0166     | 0.616          | 1.5859         | 1             | 691,537    |
| Detroit (Metropolitan) - 2000+         | 3.7   | 0.7 | 2.5      | 5.2      | 30    | 1.2902     | 0.862          | 1.8637         | 0.2144        | 817,327    |
| Hawaii - 2000+                         | 5.1#  | 1.3 | 2.9      | 8.4      | 15    | 1.7997     | 1.0003         | 2.9952         | 0.0499        | 292,973    |
| Iowa - 2000+                           | 2.3   | 0.6 | 1.3      | 3.9      | 14    | 0.8237     | 0.4473         | 1.3942         | 0.5696        | 597,459    |
| New Mexico - 2000+                     | 2.2   | 0.7 | 1        | 4.2      | 9     | 0.778      | 0.3538         | 1.4881         | 0.5697        | 406,615    |
| Seattle (Puget Sound) - 2000+          | 2.4   | 0.5 | 1.5      | 3.5      | 25    | 0.8387     | 0.5379         | 1.2517         | 0.4503        | 1,047,795  |
| Utah - 2000+                           | 3.2   | 0.7 | 2        | 5        | 21    | 1.1409     | 0.7004         | 1.7619         | 0.6149        | 647,033    |
| Atlanta (Metropolitan) - 2000+         | 1.7   | 0.4 | 1        | 2.9      | 15    | 0.609      | 0.3385         | 1.0136         | 0.0576        | 865,793    |
| San Jose-Monterey - 2000+              | 2.6   | 0.6 | 1.5      | 4.1      | 16    | 0.8972     | 0.5091         | 1.4706         | 0.7853        | 626,845    |
| Los Angeles - 2000+                    | 2.2   | 0.3 | 1.7      | 2.9      | 55    | 0.787      | 0.5851         | 1.0399         | 0.0963        | 2,456,737  |
| Alaska Natives - 2000+                 | 16.1# | 8   | 4.4      | 41.2     | 4     | 5.655      | 1.5352         | 14.5633        | 0.0121        | 24,864     |
| Rural Georgia - 2000+                  | 4.4   | 4.4 | 0.1      | 24.4     | 1     | 1.5407     | 0.0389         | 8.6205         | 0.9558        | 22,816     |
| California excluding SF/SJM/LA - 2000+ | 2.8   | 0.3 | 2.3      | 3.4      | 124   | 0.9901     | 0.8078         | 1.2057         | 0.9682        | 4,402,359  |
| Kentucky - 2000+                       | 4.5#  | 0.7 | 3.2      | 6.1      | 40    | 1.5747     | 1.1123         | 2.1729         | 0.0111        | 892,919    |
| Louisiana - 2000+                      | 3.1   | 0.6 | 2.1      | 4.4      | 29    | 1.0874     | 0.7212         | 1.5799         | 0.7138        | 937,495    |
| New Jersey - 2000+                     | 2.8   | 0.4 | 2.1      | 3.7      | 52    | 0.9962     | 0.7345         | 1.3258         | 1             | 1,834,914  |
| Greater Georgia - 2000+                | 3     | 0.5 | 2.1      | 4.1      | 37    | 1.0473     | 0.7294         | 1.4622         | 0.8339        | 1,241,866  |
|                                        |       |     |          |          |       |            |                |                |               |            |
| Age                                    | 31    | 31  | 31       | 31       | 31    | 31         | 31             | 31             | 31            | 31         |
|                                        | Rate  | SE  | Lower CI | Upper CI | Count | Rate Ratio | Ratio Lower CI | Ratio Upper CI | Ratio P-Value | Pop        |
| SEER 18                                | 3.3   | 0.1 | 3.1      | 3.6      | 624   |            |                |                |               | 18,714,968 |
| San Francisco-Oakland SMSA - 2000+     | 2.7   | 0.5 | 1.8      | 3.8      | 29    | 0.8034     | 0.5336         | 1.1655         | 0.2831        | 1,082,587  |
| Connecticut - 2000+                    | 3     | 0.7 | 1.9      | 4.6      | 21    | 0.9117     | 0.5603         | 1.406          | 0.7793        | 690,816    |
| Detroit (Metropolitan) - 2000+         | 3.2   | 0.6 | 2.1      | 4.6      | 26    | 0.9466     | 0.6135         | 1.4004         | 0.8829        | 823,756    |
| Hawaii - 2000+                         | 5.3   | 1.4 | 3        | 8.7      | 15    | 1.5843     | 0.8814         | 2.6335         | 0.1214        | 283,959    |
| Iowa - 2000+                           | 2.7   | 0.7 | 1.5      | 4.3      | 16    | 0.8        | 0.4544         | 1.3095         | 0.4502        | 599,871    |
| New Mexico - 2000+                     | 4.2   | 1   | 2.5      | 6.8      | 17    | 1.27       | 0.7351         | 2.0501         | 0.3945        | 401,459    |
| Seattle (Puget Sound) - 2000+          | 3.4   | 0.6 | 2.4      | 4.7      | 35    | 1.0121     | 0.6985         | 1.4229         | 0.9937        | 1,037,192  |
| Utah - 2000+                           | 3.8   | 0.8 | 2.5      | 5.7      | 24    | 1.1512     | 0.732          | 1.7289         | 0.5552        | 625,262    |
| Atlanta (Metropolitan) - 2000+         | 3.6   | 0.6 | 2.4      | 5.1      | 31    | 1.0771     | 0.7255         | 1.5447         | 0.7378        | 863,182    |
| San Jose-Monterey - 2000+              | 2.7   | 0.7 | 1.6      | 4.4      | 17    | 0.8242     | 0.477          | 1.3304         | 0.5116        | 618,610    |
| Los Angeles - 2000+                    | 2.7   | 0.3 | 2.1      | 3.5      | 65    | 0.8124     | 0.6193         | 1.0501         | 0.1187        | 2,399,631  |
| Alaska Natives - 2000+                 | 8.5   | 6   | 1        | 30.6     | 2     | 2.5445     | 0.3075         | 9.2301         | 0.3734        | 23,574     |
| Rural Georgia - 2000+                  | 0     | ~   | 0        | 16       | 0     | 0          | 0              | 4.8137         | 0.9278        | 23,052     |
| California excluding SF/SJM/LA - 2000+ | 3.1   | 0.3 | 2.6      | 3.6      | 133   | 0.9195     | 0.7567         | 1.1105         | 0.407         | 4,337,975  |
| Kentucky - 2000+                       | 4.1   | 0.7 | 2.9      | 5.7      | 37    | 1.2362     | 0.8622         | 1.7229         | 0.2483        | 897,698    |
| Louisiana - 2000+                      | 4.3   | 0.7 | 3.1      | 5.9      | 40    | 1.2924     | 0.9143         | 1.7801         | 0.1451        | 928,260    |
| New Jersey - 2000+                     | 3.7   | 0.4 | 2.9      | 4.7      | 68    | 1.1116     | 0.8524         | 1.4295         | 0.4413        | 1,834,697  |
| Greater Georgia - 2000+                | 3.9   | 0.6 | 2.8      | 5.1      | 48    | 1.1578     | 0.8446         | 1.5541         | 0.3658        | 1,243,387  |

| Age                                    | 32   | 32  | 32       | 32       | 32    | 32         | 32             | 32             | 32            | 32         |
|----------------------------------------|------|-----|----------|----------|-------|------------|----------------|----------------|---------------|------------|
|                                        | Rate | SE  | Lower CI | Upper CI | Count | Rate Ratio | Ratio Lower CI | Ratio Upper CI | Ratio P-Value | Pop        |
| SEER 18                                | 3.8  | 0.1 | 3.5      | 4.1      | 719   |            |                |                |               | 18,854,636 |
| San Francisco-Oakland SMSA - 2000+     | 3.2  | 0.5 | 2.2      | 4.5      | 35    | 0.8394     | 0.58           | 1.1785         | 0.3524        | 1,093,391  |
| Connecticut - 2000+                    | 3.1  | 0.7 | 2        | 4.7      | 22    | 0.8181     | 0.5095         | 1.2483         | 0.4113        | 705,181    |
| Detroit (Metropolitan) - 2000+         | 3.1  | 0.6 | 2        | 4.5      | 26    | 0.8139     | 0.528          | 1.2025         | 0.347         | 837,714    |
| Hawaii - 2000+                         | 3.2  | 1.1 | 1.4      | 6        | 9     | 0.8266     | 0.3765         | 1.5781         | 0.7088        | 285,505    |
| Iowa - 2000+                           | 3.7  | 0.8 | 2.3      | 5.5      | 22    | 0.9579     | 0.5965         | 1.4616         | 0.9525        | 602,283    |
| New Mexico - 2000+                     | 3.3  | 0.9 | 1.8      | 5.6      | 13    | 0.8632     | 0.4574         | 1.4856         | 0.719         | 394,937    |
| Seattle (Puget Sound) - 2000+          | 2.8  | 0.5 | 1.9      | 4        | 29    | 0.7268     | 0.4832         | 1.053          | 0.0979        | 1,046,284  |
| Utah - 2000+                           | 5.5  | 0.9 | 3.8      | 7.6      | 34    | 1.4322     | 0.984          | 2.02           | 0.0604        | 622,546    |
| Atlanta (Metropolitan) - 2000+         | 3.4  | 0.6 | 2.2      | 4.8      | 29    | 0.8806     | 0.5855         | 1.2758         | 0.5726        | 863,594    |
| San Jose-Monterey - 2000+              | 3.9  | 0.8 | 2.5      | 5.7      | 24    | 1.0133     | 0.6449         | 1.5199         | 1             | 621,125    |
| Los Angeles - 2000+                    | 2.9# | 0.3 | 2.3      | 3.7      | 71    | 0.7727     | 0.5968         | 0.9871         | 0.0383        | 2,409,402  |
| Alaska Natives - 2000+                 | 4.3  | 4.3 | 0.1      | 23.7     | 1     | 1.1178     | 0.0283         | 6.2478         | 1             | 23,460     |
| Rural Georgia - 2000+                  | 4.3  | 4.3 | 0.1      | 24.2     | 1     | 1.1379     | 0.0288         | 6.36           | 1             | 23,046     |
| California excluding SF/SJM/LA - 2000+ | 3.9  | 0.3 | 3.3      | 4.5      | 168   | 1.0098     | 0.8486         | 1.1961         | 0.9363        | 4,362,686  |
| Kentucky - 2000+                       | 6.3# | 0.8 | 4.8      | 8.2      | 57    | 1.654      | 1.2402         | 2.1678         | 0.0008        | 903,685    |
| Louisiana - 2000+                      | 4.9  | 0.7 | 3.6      | 6.6      | 46    | 1.295      | 0.9395         | 1.7456         | 0.1135        | 931,518    |
| New Jersey - 2000+                     | 3.7  | 0.4 | 2.9      | 4.7      | 69    | 0.9697     | 0.7462         | 1.2427         | 0.8687        | 1,865,931  |
| Greater Georgia - 2000+                | 5    | 0.6 | 3.8      | 6.4      | 63    | 1.3087     | 0.9951         | 1.6947         | 0.0542        | 1,262,348  |
|                                        |      |     |          |          |       |            |                |                |               |            |
| Age                                    | 33   | 33  | 33       | 33       | 33    | 33         | 33             | 33             | 33            | 33         |
|                                        | Rate | SE  | Lower CI | Upper CI | Count | Rate Ratio | Ratio Lower CI | Ratio Upper CI | Ratio P-Value | Pop        |
| SEER 18                                | 4.9  | 0.2 | 4.5      | 5.2      | 914   |            |                |                |               | 18,811,084 |
| San Francisco-Oakland SMSA - 2000+     | 4.5  | 0.6 | 3.3      | 6        | 49    | 0.9296     | 0.6826         | 1.2395         | 0.6822        | 1,084,827  |
| Connecticut - 2000+                    | 4.8  | 0.8 | 3.3      | 6.7      | 34    | 0.9864     | 0.6789         | 1.3885         | 1             | 709,433    |
| Detroit (Metropolitan) - 2000+         | 5.3  | 0.8 | 3.9      | 7.1      | 45    | 1.0995     | 0.7963         | 1.4834         | 0.5762        | 842,321    |
| Hawaii - 2000+                         | 5.7  | 1.4 | 3.2      | 9.2      | 16    | 1.1638     | 0.6624         | 1.9003         | 0.6165        | 282,939    |
| Iowa - 2000+                           | 3.5  | 0.8 | 2.2      | 5.4      | 21    | 0.7285     | 0.4488         | 1.1204         | 0.1691        | 593,243    |
| New Mexico - 2000+                     | 4.6  | 1.1 | 2.7      | 7.2      | 18    | 0.9368     | 0.5527         | 1.489          | 0.9024        | 395,451    |
| Seattle (Puget Sound) - 2000+          | 5.2  | 0.7 | 3.9      | 6.8      | 54    | 1.0677     | 0.7959         | 1.4055         | 0.6791        | 1,040,917  |
| Utah - 2000+                           | 4.2  | 0.8 | 2.8      | 6.2      | 26    | 0.8706     | 0.5656         | 1.284          | 0.5581        | 614,670    |
| Atlanta (Metropolitan) - 2000+         | 4.9  | 0.8 | 3.5      | 6.6      | 42    | 1.0033     | 0.7181         | 1.3671         | 1             | 861,546    |
| San Jose-Monterey - 2000+              | 5.5  | 0.9 | 3.8      | 7.7      | 34    | 1.1279     | 0.7763         | 1.5878         | 0.538         | 620,399    |
| Los Angeles - 2000+                    | 4    | 0.4 | 3.2      | 4.9      | 95    | 0.8179     | 0.655          | 1.0112         | 0.0642        | 2,390,638  |
| Alaska Natives - 2000+                 | 8.7  | 6.1 | 1.1      | 31.4     | 2     | 1.7868     | 0.2161         | 6.4729         | 0.6169        | 23,037     |
| Rural Georgia - 2000+                  | 8.7  | 6.1 | 1        | 31.3     | 2     | 1.7807     | 0.2153         | 6.4508         | 0.6197        | 23,116     |
| California excluding SF/SJM/LA - 2000+ | 4.5  | 0.3 | 3.9      | 5.1      | 194   | 0.9174     | 0.7816         | 1.0723         | 0.292         | 4,352,299  |
| Kentucky - 2000+                       | 7.3# | 0.9 | 5.6      | 9.2      | 66    | 1.4922     | 1.1442         | 1.9169         | 0.0035        | 910,300    |
| Louisiana - 2000+                      | 5.2  | 0.8 | 3.9      | 6.9      | 48    | 1.0772     | 0.7884         | 1.4403         | 0.6568        | 917,129    |
| New Jersey - 2000+                     | 4.9  | 0.5 | 4        | 6.1      | 93    | 1.0186     | 0.8139         | 1.2619         | 0.8974        | 1,879,143  |
| Greater Georgia - 2000+                | 5.9  | 0.7 | 4.6      | 7.4      | 75    | 1.2157     | 0.9476         | 1.5396         | 0.1238        | 1,269,676  |

| Age                                    | 34    | 34  | 34       | 34       | 34    | 34         | 34             | 34             | 34            | 34         |
|----------------------------------------|-------|-----|----------|----------|-------|------------|----------------|----------------|---------------|------------|
|                                        | Rate  | SE  | Lower CI | Upper CI | Count | Rate Ratio | Ratio Lower CI | Ratio Upper CI | Ratio P-Value | Pop        |
| SEER 18                                | 5.1   | 0.2 | 4.8      | 5.4      | 954   |            |                |                |               | 18,804,219 |
| San Francisco-Oakland SMSA - 2000+     | 4.1   | 0.6 | 3        | 5.5      | 44    | 0.8037     | 0.5801         | 1.0874         | 0.1709        | 1,079,064  |
| Connecticut - 2000+                    | 5.1   | 0.8 | 3.6      | 7        | 37    | 1.008      | 0.7053         | 1.3995         | 1             | 723,537    |
| Detroit (Metropolitan) - 2000+         | 6.8#  | 0.9 | 5.2      | 8.8      | 58    | 1.3387     | 1.0087         | 1.7459         | 0.0435        | 853,976    |
| Hawaii - 2000+                         | 2.9   | 1   | 1.2      | 5.7      | 8     | 0.5672     | 0.2442         | 1.1221         | 0.1205        | 278,023    |
| Iowa - 2000+                           | 5.2   | 0.9 | 3.6      | 7.4      | 31    | 1.0328     | 0.6978         | 1.476          | 0.9099        | 591,623    |
| New Mexico - 2000+                     | 6.4   | 1.3 | 4.1      | 9.4      | 25    | 1.2617     | 0.8123         | 1.8741         | 0.3001        | 390,571    |
| Seattle (Puget Sound) - 2000+          | 4.8   | 0.7 | 3.6      | 6.4      | 50    | 0.9525     | 0.7019         | 1.2662         | 0.807         | 1,034,655  |
| Utah - 2000+                           | 3.5   | 0.8 | 2.1      | 5.3      | 21    | 0.682      | 0.4202         | 1.0485         | 0.0866        | 606,969    |
| Atlanta (Metropolitan) - 2000+         | 5.2   | 0.8 | 3.8      | 7        | 45    | 1.0346     | 0.7495         | 1.3953         | 0.8662        | 857,336    |
| San Jose-Monterey - 2000+              | 4.7   | 0.9 | 3.1      | 6.8      | 29    | 0.9269     | 0.6173         | 1.34           | 0.7749        | 616,703    |
| Los Angeles - 2000+                    | 4.1#  | 0.4 | 3.3      | 5        | 97    | 0.8047     | 0.6461         | 0.9924         | 0.0418        | 2,376,122  |
| Alaska Natives - 2000+                 | 8.8   | 6.2 | 1.1      | 31.7     | 2     | 1.7293     | 0.2091         | 6.2638         | 0.6441        | 22,797     |
| Rural Georgia - 2000+                  | 4.2   | 4.2 | 0.1      | 23.4     | 1     | 0.8265     | 0.0209         | 4.6159         | 1             | 23,849     |
| California excluding SF/SJM/LA - 2000+ | 4.9   | 0.3 | 4.3      | 5.6      | 214   | 0.9724     | 0.8345         | 1.1289         | 0.7446        | 4,337,926  |
| Kentucky - 2000+                       | 6.9#  | 0.9 | 5.3      | 8.8      | 63    | 1.3599     | 1.0366         | 1.7558         | 0.0268        | 913,139    |
| Louisiana - 2000+                      | 6.2   | 0.8 | 4.7      | 8.1      | 57    | 1.2265     | 0.9219         | 1.603          | 0.1601        | 916,043    |
| New Jersey - 2000+                     | 5.2   | 0.5 | 4.3      | 6.4      | 100   | 1.0326     | 0.8318         | 1.2699         | 0.7904        | 1,908,811  |
| Greater Georgia - 2000+                | 5.7   | 0.7 | 4.4      | 7.1      | 72    | 1.1148     | 0.8648         | 1.4175         | 0.4057        | 1,273,075  |
|                                        |       |     |          |          |       |            |                |                |               |            |
|                                        |       |     |          |          |       |            |                |                |               |            |
| Age                                    | 35    | 35  | 35       | 35       | 35    | 35         | 35             | 35             | 35            | 35         |
|                                        | Rate  | SE  | Lower CI | Upper CI | Count | Rate Ratio | Ratio Lower CI | Ratio Upper CI | Ratio P-Value | Pop        |
| SEER 18                                | 5.9   | 0.2 | 5.6      | 6.3      | 1,120 |            |                |                |               | 18,926,176 |
| San Francisco-Oakland SMSA - 2000+     | 4.2#  | 0.6 | 3.1      | 5.6      | 46    | 0.7114     | 0.5178         | 0.9554         | 0.0217        | 1,092,660  |
| Connecticut - 2000+                    | 6.5   | 0.9 | 4.8      | 8.6      | 48    | 1.0907     | 0.7994         | 1.4562         | 0.5962        | 743,663    |
| Detroit (Metropolitan) - 2000+         | 5.6   | 0.8 | 4.1      | 7.4      | 48    | 0.9453     | 0.6928         | 1.2621         | 0.772         | 858,034    |
| Hawaii - 2000+                         | 11.6# | 2   | 8        | 16.3     | 33    | 1.9639     | 1.3451         | 2.7744         | 0.0007        | 283,947    |
| Iowa - 2000+                           | 6.8   | 1.1 | 4.8      | 9.2      | 40    | 1.1431     | 0.8121         | 1.5665         | 0.4484        | 591,336    |
| New Mexico - 2000+                     | 4.3   | 1   | 2.5      | 6.9      | 17    | 0.7287     | 0.423          | 1.1721         | 0.2248        | 394,213    |
| Seattle (Puget Sound) - 2000+          | 5.3   | 0.7 | 4        | 6.9      | 55    | 0.895      | 0.67           | 1.1736         | 0.4662        | 1,038,400  |
| Utah - 2000+                           | 5.4   | 1   | 3.7      | 7.7      | 31    | 0.9205     | 0.6224         | 1.3141         | 0.7311        | 569,118    |
| Atlanta (Metropolitan) - 2000+         | 5.2   | 0.8 | 3.8      | 7        | 45    | 0.8791     | 0.6375         | 1.1842         | 0.4424        | 865,034    |
| San Jose-Monterey - 2000+              | 5.3   | 0.9 | 3.7      | 7.5      | 33    | 0.8999     | 0.6163         | 1.2713         | 0.6213        | 619,690    |
| Los Angeles - 2000+                    | 5.4   | 0.5 | 4.5      | 6.4      | 129   | 0.9105     | 0.7528         | 1.0933         | 0.3352        | 2,394,241  |
| Alaska Natives - 2000+                 | 4.3   | 4.3 | 0.1      | 23.8     | 1     | 0.7233     | 0.0183         | 4.0384         | 1             | 23,362     |
| Rural Georgia - 2000+                  | 0     | ~   | 0        | 15.5     | 0     | 0          | 0              | 2.6241         | 0.4897        | 23,794     |
| California excluding SF/SJM/LA - 2000+ | 5.6   | 0.4 | 5        | 6.4      | 246   | 0.9525     | 0.8263         | 1.0944         | 0.514         | 4,364,347  |
| Kentucky - 2000+                       | 7.8#  | 0.9 | 6.1      | 9.8      | 71    | 1.3119     | 1.0172         | 1.6684         | 0.0367        | 914,522    |
| Louisiana - 2000+                      | 8.3#  | 1   | 6.5      | 10.4     | 75    | 1.4062     | 1.0978         | 1.7775         | 0.0074        | 901,291    |
| New Jersey - 2000+                     | 6.1   | 0.6 | 5.1      | 7.3      | 120   | 1.0351     | 0.8502         | 1.2505         | 0.7469        | 1,958,960  |
| Greater Georgia - 2000+                | 6.4   | 0.7 | 5.1      | 7.9      | 82    | 1.0745     | 0.848          | 1.3454         | 0.5613        | 1,289,564  |

| Age                                    | 36    | 36   | 36       | 36       | 36    | 36         | 36             | 36             | 36            | 36         |
|----------------------------------------|-------|------|----------|----------|-------|------------|----------------|----------------|---------------|------------|
|                                        | Rate  | SE   | Lower CI | Upper CI | Count | Rate Ratio | Ratio Lower CI | Ratio Upper CI | Ratio P-Value | Pop        |
| SEER 18                                | 6.7   | 0.2  | 6.4      | 7.1      | 1,276 |            |                |                |               | 18,944,410 |
| San Francisco-Oakland SMSA - 2000+     | 6.4   | 0.8  | 5        | 8.1      | 69    | 0.9475     | 0.7326         | 1.2077         | 0.7186        | 1,081,157  |
| Connecticut - 2000+                    | 6.3   | 0.9  | 4.7      | 8.4      | 48    | 0.9376     | 0.6877         | 1.2507         | 0.728         | 760,070    |
| Detroit (Metropolitan) - 2000+         | 5.4   | 0.8  | 4        | 7.2      | 47    | 0.8014     | 0.5858         | 1.0722         | 0.1471        | 870,669    |
| Hawaii - 2000+                         | 8.5   | 1.7  | 5.4      | 12.6     | 24    | 1.2597     | 0.8041         | 1.883          | 0.3128        | 282,854    |
| Iowa - 2000+                           | 4.7   | 0.9  | 3.1      | 6.8      | 28    | 0.7013     | 0.4641         | 1.0185         | 0.0641        | 592,770    |
| New Mexico - 2000+                     | 5.3   | 1.2  | 3.3      | 8.2      | 21    | 0.7931     | 0.4892         | 1.2175         | 0.3388        | 393,140    |
| Seattle (Puget Sound) - 2000+          | 7.5   | 0.9  | 6        | 9.4      | 78    | 1.1188     | 0.8785         | 1.4068         | 0.3652        | 1,035,061  |
| Utah - 2000+                           | 8.8   | 1.3  | 6.5      | 11.6     | 49    | 1.3061     | 0.9611         | 1.7374         | 0.0872        | 556,986    |
| Atlanta (Metropolitan) - 2000+         | 6.8   | 0.9  | 5.1      | 8.8      | 58    | 1.0054     | 0.759          | 1.3082         | 1             | 856,526    |
| San Jose-Monterey - 2000+              | 5     | 0.9  | 3.4      | 7.1      | 31    | 0.7455     | 0.5044         | 1.0635         | 0.1136        | 617,395    |
| Los Angeles - 2000+                    | 5.5#  | 0.5  | 4.6      | 6.6      | 131   | 0.8202     | 0.6799         | 0.9824         | 0.0305        | 2,371,306  |
| Alaska Natives - 2000+                 | 21.9# | 9.8  | 7.1      | 51.1     | 5     | 3.2517     | 1.054          | 7.6083         | 0.0411        | 22,829     |
| Rural Georgia - 2000+                  | 8.2   | 5.8  | 1        | 29.6     | 2     | 1.215      | 0.147          | 4.3978         | 0.9803        | 24,440     |
| California excluding SF/SJM/LA - 2000+ | 6.8   | 0.4  | 6.1      | 7.7      | 299   | 1.0169     | 0.8936         | 1.1543         | 0.8138        | 4,365,205  |
| Kentucky - 2000+                       | 9.0#  | 1    | 7.2      | 11.2     | 83    | 1.3396     | 1.0597         | 1.6735         | 0.0149        | 919,851    |
| Louisiana - 2000+                      | 7.7   | 0.9  | 6        | 9.7      | 70    | 1.1407     | 0.8836         | 1.4515         | 0.3133        | 911,080    |
| New Jersey - 2000+                     | 6.5   | 0.6  | 5.4      | 7.7      | 128   | 0.9594     | 0.7937         | 1.1514         | 0.6961        | 1,980,720  |
| Greater Georgia - 2000+                | 8.1   | 0.8  | 6.6      | 9.8      | 105   | 1.197      | 0.9715         | 1.4614         | 0.091         | 1,302,351  |
|                                        |       |      |          |          |       |            |                |                |               |            |
| Age                                    | 37    | 37   | 37       | 37       | 37    | 37         | 37             | 37             | 37            | 37         |
|                                        | Rate  | SE   | Lower CI | Upper CI | Count | Rate Ratio | Ratio Lower CI | Ratio Upper CI | Ratio P-Value | Pop        |
| SEER 18                                | 7.3   | 0.2  | 6.9      | 7.7      | 1,395 |            |                |                |               | 19,035,820 |
| San Francisco-Oakland SMSA - 2000+     | 7.1   | 0.8  | 5.6      | 8.8      | 76    | 0.9627     | 0.7539         | 1.2132         | 0.8036        | 1,077,259  |
| Connecticut - 2000+                    | 6.7   | 0.9  | 5        | 8.8      | 52    | 0.9161     | 0.6808         | 1.2083         | 0.5905        | 774,547    |
| Detroit (Metropolitan) - 2000+         | 6.3   | 0.8  | 4.7      | 8.1      | 55    | 0.8535     | 0.6396         | 1.1175         | 0.2738        | 879,375    |
| Hawaii - 2000+                         | 10.6  | 1.9  | 7.2      | 15.1     | 30    | 1.4469     | 0.9725         | 2.075          | 0.0679        | 282,928    |
| Iowa - 2000+                           | 9.2   | 1.2  | 7        | 12       | 55    | 1.2599     | 0.9442         | 1.6497         | 0.1154        | 595,688    |
| New Mexico - 2000+                     | 8.6   | 1.5  | 5.9      | 12       | 34    | 1.1674     | 0.8052         | 1.6392         | 0.4177        | 397,426    |
| Seattle (Puget Sound) - 2000+          | 5.9   | 0.8  | 4.6      | 7.6      | 62    | 0.8113     | 0.6186         | 1.0465         | 0.1135        | 1,042,796  |
| Utah - 2000+                           | 6.1   | 1.1  | 4.2      | 8.5      | 33    | 0.8263     | 0.5665         | 1.166          | 0.3146        | 544,959    |
| Atlanta (Metropolitan) - 2000+         | 8.4   | 1    | 6.6      | 10.6     | 72    | 1.1488     | 0.8936         | 1.4564         | 0.2793        | 855,221    |
| San Jose-Monterey - 2000+              | 7.3   | 1.1  | 5.3      | 9.7      | 45    | 0.9938     | 0.7215         | 1.3369         | 1             | 617,915    |
| Los Angeles - 2000+                    | 5.5#  | 0.5  | 4.6      | 6.5      | 129   | 0.7451     | 0.6172         | 0.8929         | 0.0011        | 2,362,509  |
| Alaska Natives - 2000+                 | 26.0# | 10.6 | 9.6      | 56.7     | 6     | 3.553      | 1.3016         | 7.7529         | 0.0157        | 23,044     |
| Rural Georgia - 2000+                  | 8.2   | 5.8  | 1        | 29.5     | 2     | 1.1128     | 0.1346         | 4.0275         | 1             | 24,524     |
| California excluding SF/SJM/LA - 2000+ | 6.6   | 0.4  | 5.8      | 7.4      | 288   | 0.8952     | 0.7858         | 1.017          | 0.0906        | 4,390,002  |
| Kentucky - 2000+                       | 9.1   | 1    | 7.2      | 11.2     | 84    | 1.235      | 0.9788         | 1.5399         | 0.0748        | 928,143    |
| Louisiana - 2000+                      | 9.4#  | 1    | 7.5      | 11.6     | 86    | 1.2839     | 1.0204         | 1.597          | 0.0332        | 914,018    |
| New Jersey - 2000+                     | 8.7#  | 0.7  | 7.4      | 10       | 174   | 1.181      | 1.0029         | 1.3834         | 0.0461        | 2,010,529  |
| Greater Georgia - 2000+                | 8.5   | 0.8  | 7        | 10.2     | 112   | 1.1623     | 0.9501         | 1.4098         | 0.1433        | 1,314,937  |

| Age                                    | 38    | 38  | 38       | 38       | 38    | 38         | 38             | 38             | 38            | 38         |
|----------------------------------------|-------|-----|----------|----------|-------|------------|----------------|----------------|---------------|------------|
|                                        | Rate  | SE  | Lower CI | Upper CI | Count | Rate Ratio | Ratio Lower CI | Ratio Upper CI | Ratio P-Value | Pop        |
| SEER 18                                | 8.9   | 0.2 | 8.5      | 9.3      | 1,706 |            |                |                |               | 19,161,807 |
| San Francisco-Oakland SMSA - 2000+     | 8.8   | 0.9 | 7.1      | 10.8     | 95    | 0.9904     | 0.7969         | 1.2181         | 0.9812        | 1,077,407  |
| Connecticut - 2000+                    | 8.9   | 1.1 | 6.9      | 11.2     | 70    | 0.9944     | 0.7715         | 1.2631         | 1             | 790,706    |
| Detroit (Metropolitan) - 2000+         | 9.3   | 1   | 7.4      | 11.6     | 83    | 1.0468     | 0.8295         | 1.3052         | 0.7152        | 890,567    |
| Hawaii - 2000+                         | 8.8   | 1.8 | 5.7      | 13       | 25    | 0.9914     | 0.6397         | 1.4686         | 1             | 283,236    |
| Iowa - 2000+                           | 8.3   | 1.2 | 6.1      | 10.9     | 50    | 0.9287     | 0.6865         | 1.23           | 0.6679        | 604,735    |
| New Mexico - 2000+                     | 7.2   | 1.3 | 4.8      | 10.4     | 29    | 0.8102     | 0.5409         | 1.1679         | 0.2959        | 402,045    |
| Seattle (Puget Sound) - 2000+          | 8.2   | 0.9 | 6.6      | 10.2     | 86    | 0.9259     | 0.7367         | 1.1501         | 0.5258        | 1,043,304  |
| Utah - 2000+                           | 8.4   | 1.3 | 6.1      | 11.3     | 45    | 0.9458     | 0.6873         | 1.2712         | 0.7842        | 534,380    |
| Atlanta (Metropolitan) - 2000+         | 8.6   | 1   | 6.8      | 10.8     | 74    | 0.97       | 0.7579         | 1.2244         | 0.8563        | 856,909    |
| San Jose-Monterey - 2000+              | 5.3#  | 0.9 | 3.7      | 7.5      | 33    | 0.5992     | 0.4111         | 0.8449         | 0.0022        | 618,536    |
| Los Angeles - 2000+                    | 7.8   | 0.6 | 6.7      | 9        | 184   | 0.8759     | 0.7482         | 1.0204         | 0.091         | 2,359,443  |
| Alaska Natives - 2000+                 | 17.5  | 8.8 | 4.8      | 44.9     | 4     | 1.9682     | 0.5357         | 5.0486         | 0.2982        | 22,827     |
| Rural Georgia - 2000+                  | 7.9   | 5.6 | 1        | 28.4     | 2     | 0.8825     | 0.1068         | 3.1928         | 1             | 25,455     |
| California excluding SF/SJM/LA - 2000+ | 8.4   | 0.4 | 7.6      | 9.3      | 371   | 0.9421     | 0.8398         | 1.0546         | 0.3107        | 4,423,251  |
| Kentucky - 2000+                       | 11.5# | 1.1 | 9.4      | 13.9     | 108   | 1.2926     | 1.0541         | 1.5707         | 0.014         | 938,490    |
| Louisiana - 2000+                      | 12.1# | 1.1 | 9.9      | 14.5     | 111   | 1.3561     | 1.1089         | 1.6438         | 0.0033        | 919,392    |
| New Jersey - 2000+                     | 9.7   | 0.7 | 8.4      | 11.2     | 199   | 1.0939     | 0.9397         | 1.2676         | 0.2476        | 2,043,335  |
| Greater Georgia - 2000+                | 10.3  | 0.9 | 8.7      | 12.2     | 137   | 1.1589     | 0.9666         | 1.3799         | 0.1108        | 1,327,789  |
|                                        |       |     |          |          |       |            |                |                |               |            |
| Age                                    | 39    | 39  | 39       | 39       | 39    | 39         | 39             | 39             | 39            | 39         |
|                                        | Rate  | SE  | Lower CI | Upper CI | Count | Rate Ratio | Ratio Lower CI | Ratio Upper CI | Ratio P-Value | Pop        |
| SEER 18                                | 10.2  | 0.2 | 9.8      | 10.7     | 1,977 |            |                |                |               | 19,309,878 |
| San Francisco-Oakland SMSA - 2000+     | 9.3   | 0.9 | 7.5      | 11.3     | 100   | 0.9042     | 0.7321         | 1.1057         | 0.3512        | 1,080,204  |
| Connecticut - 2000+                    | 12.5  | 1.2 | 10.2     | 15.2     | 102   | 1.2256     | 0.9944         | 1.496          | 0.0564        | 812,856    |
| Detroit (Metropolitan) - 2000+         | 9.7   | 1   | 7.8      | 12       | 88    | 0.9515     | 0.7596         | 1.1782         | 0.6966        | 903,371    |
| Hawaii - 2000+                         | 13.3  | 2.2 | 9.4      | 18.2     | 38    | 1.2951     | 0.9137         | 1.784          | 0.1445        | 286,582    |
| Iowa - 2000+                           | 11.3  | 1.4 | 8.8      | 14.2     | 69    | 1.0993     | 0.8518         | 1.3976         | 0.4721        | 613,090    |
| New Mexico - 2000+                     | 8.5   | 1.4 | 5.9      | 11.9     | 35    | 0.8327     | 0.5783         | 1.1621         | 0.3183        | 410,544    |
| Seattle (Puget Sound) - 2000+          | 9     | 0.9 | 7.3      | 11       | 95    | 0.8801     | 0.7087         | 1.0816         | 0.2408        | 1,054,280  |
| Utah - 2000+                           | 10.9  | 1.4 | 8.3      | 14.1     | 57    | 1.0652     | 0.8037         | 1.3859         | 0.6752        | 522,674    |
| Atlanta (Metropolitan) - 2000+         | 8.0#  | 1   | 6.2      | 10.1     | 68    | 0.777      | 0.6009         | 0.9895         | 0.0401        | 854,840    |
| San Jose-Monterey - 2000+              | 11.5  | 1.4 | 9        | 14.5     | 71    | 1.1256     | 0.8755         | 1.4265         | 0.3575        | 616,074    |
| Los Angeles - 2000+                    | 9.9   | 0.7 | 8.7      | 11.3     | 234   | 0.9713     | 0.8446         | 1.1128         | 0.7048        | 2,352,985  |
| Alaska Natives - 2000+                 | 17.3  | 8.7 | 4.7      | 44.4     | 4     | 1.6931     | 0.4608         | 4.3418         | 0.4276        | 23,076     |
| Rural Georgia - 2000+                  | 11.7  | 6.8 | 2.4      | 34.3     | 3     | 1.1474     | 0.2364         | 3.3582         | 0.9709        | 25,537     |
| California excluding SF/SJM/LA - 2000+ | 8.6#  | 0.4 | 7.8      | 9.5      | 385   | 0.8434     | 0.7542         | 0.9412         | 0.0021        | 4,458,389  |
| Kentucky - 2000+                       | 13.2# | 1.2 | 11       | 15.7     | 125   | 1.2868     | 1.0652         | 1.5423         | 0.0093        | 948,828    |
| Louisiana - 2000+                      | 14.1# | 1.2 | 11.7     | 16.7     | 130   | 1.3733     | 1.141          | 1.6406         | 0.0009        | 924,588    |
| New Jersey - 2000+                     | 9.7   | 0.7 | 8.4      | 11.2     | 202   | 0.9504     | 0.8182         | 1.099          | 0.5177        | 2,075,931  |
| Greater Georgia - 2000+                | 12.7# | 1   | 10.9     | 14.8     | 171   | 1.2408     | 1.0551         | 1.4513         | 0.0094        | 1,346,029  |

| Age                                    | 40    | 40   | 40       | 40       | 40    | 40         | 40             | 40             | 40            | 40         |
|----------------------------------------|-------|------|----------|----------|-------|------------|----------------|----------------|---------------|------------|
|                                        | Rate  | SE   | Lower CI | Upper CI | Count | Rate Ratio | Ratio Lower CI | Ratio Upper CI | Ratio P-Value | Pop        |
| SEER 18                                | 11.8  | 0.2  | 11.3     | 12.3     | 2,301 |            |                |                |               | 19,493,038 |
| San Francisco-Oakland SMSA - 2000+     | 10.6  | 1    | 8.8      | 12.7     | 116   | 0.8994     | 0.7399         | 1.0842         | 0.284         | 1,092,578  |
| Connecticut - 2000+                    | 12.9  | 1.2  | 10.5     | 15.5     | 107   | 1.089      | 0.8885         | 1.3222         | 0.4144        | 832,406    |
| Detroit (Metropolitan) - 2000+         | 12.7  | 1.2  | 10.5     | 15.3     | 117   | 1.0783     | 0.8877         | 1.2988         | 0.4514        | 919,208    |
| Hawaii - 2000+                         | 16.1  | 2.3  | 11.8     | 21.4     | 47    | 1.3618     | 0.9977         | 1.817          | 0.0517        | 292,386    |
| Iowa - 2000+                           | 14.8# | 1.5  | 11.9     | 18.1     | 93    | 1.253      | 1.0072         | 1.542          | 0.043         | 628,770    |
| New Mexico - 2000+                     | 8.7   | 1.4  | 6.1      | 12       | 36    | 0.7368     | 0.5147         | 1.0231         | 0.0705        | 413,927    |
| Seattle (Puget Sound) - 2000+          | 9.8   | 1    | 8        | 11.9     | 104   | 0.829      | 0.6744         | 1.0092         | 0.0625        | 1,062,821  |
| Utah - 2000+                           | 10.9  | 1.5  | 8.2      | 14.1     | 56    | 0.9215     | 0.6939         | 1.2009         | 0.5995        | 514,837    |
| Atlanta (Metropolitan) - 2000+         | 14.4# | 1.3  | 11.9     | 17.1     | 123   | 1.2173     | 1.0069         | 1.4598         | 0.0423        | 856,026    |
| San Jose-Monterey - 2000+              | 9.1   | 1.2  | 6.9      | 11.8     | 56    | 0.7693     | 0.5793         | 1.0026         | 0.0525        | 616,661    |
| Los Angeles - 2000+                    | 9.8#  | 0.6  | 8.6      | 11.1     | 231   | 0.8287     | 0.7207         | 0.9492         | 0.006         | 2,361,340  |
| Alaska Natives - 2000+                 | 43.4# | 13.7 | 20.8     | 79.8     | 10    | 3.6751     | 1.76           | 6.771          | 0.0011        | 23,051     |
| Rural Georgia - 2000+                  | 19    | 8.5  | 6.2      | 44.4     | 5     | 1.6136     | 0.5234         | 3.771          | 0.4039        | 26,251     |
| California excluding SF/SJM/LA - 2000+ | 10.9  | 0.5  | 10       | 11.9     | 491   | 0.9261     | 0.8384         | 1.0213         | 0.1264        | 4,491,661  |
| Kentucky - 2000+                       | 15.7# | 1.3  | 13.2     | 18.4     | 150   | 1.3261     | 1.1166         | 1.5648         | 0.0014        | 958,225    |
| Louisiana - 2000+                      | 14.8# | 1.3  | 12.4     | 17.4     | 138   | 1.2509     | 1.0457         | 1.4858         | 0.0147        | 934,601    |
| New Jersey - 2000+                     | 11.4  | 0.7  | 10       | 12.9     | 240   | 0.9623     | 0.839          | 1.0996         | 0.5988        | 2,112,748  |
| Greater Georgia - 2000+                | 13.4  | 1    | 11.5     | 15.4     | 181   | 1.1312     | 0.9669         | 1.3165         | 0.1233        | 1,355,541  |
|                                        |       |      |          |          |       |            |                |                |               |            |
| Age                                    | 41    | 41   | 41       | 41       | 41    | 41         | 41             | 41             | 41            | 41         |
|                                        | Rate  | SE   | Lower CI | Upper CI | Count | Rate Ratio | Ratio Lower CI | Ratio Upper CI | Ratio P-Value | Pop        |
| SEER 18                                | 13.2  | 0.3  | 12.7     | 13.7     | 2,583 |            |                |                |               | 19,612,049 |
| San Francisco-Oakland SMSA - 2000+     | 11.3  | 1    | 9.4      | 13.5     | 122   | 0.858      | 0.7096         | 1.0291         | 0.1023        | 1,079,615  |
| Connecticut - 2000+                    | 11.6  | 1.2  | 9.4      | 14.1     | 99    | 0.8818     | 0.714          | 1.078          | 0.2351        | 852,437    |
| Detroit (Metropolitan) - 2000+         | 11.3  | 1.1  | 9.2      | 13.6     | 105   | 0.8553     | 0.6968         | 1.0398         | 0.1221        | 932,145    |
| Hawaii - 2000+                         | 19.8# | 2.6  | 15.1     | 25.7     | 58    | 1.5067     | 1.1408         | 1.9542         | 0.0044        | 292,272    |
| Iowa - 2000+                           | 14.3  | 1.5  | 11.5     | 17.5     | 91    | 1.0841     | 0.8697         | 1.3363         | 0.4773        | 637,345    |
| New Mexico - 2000+                     | 11.9  | 1.7  | 8.8      | 15.7     | 50    | 0.9023     | 0.6679         | 1.1932         | 0.5221        | 420,754    |
| Seattle (Puget Sound) - 2000+          | 11.3  | 1    | 9.4      | 13.5     | 121   | 0.8567     | 0.7079         | 1.0283         | 0.1002        | 1,072,400  |
| Utah - 2000+                           | 12.4  | 1.6  | 9.5      | 15.8     | 63    | 0.9406     | 0.7206         | 1.2075         | 0.6875        | 508,562    |
| Atlanta (Metropolitan) - 2000+         | 13.7  | 1.3  | 11.3     | 16.4     | 117   | 1.0407     | 0.8572         | 1.2528         | 0.699         | 853,597    |
| San Jose-Monterey - 2000+              | 11.7  | 1.4  | 9.2      | 14.8     | 72    | 0.892      | 0.6957         | 1.1274         | 0.3696        | 612,855    |
| Los Angeles - 2000+                    | 12.5  | 0.7  | 11.1     | 14       | 293   | 0.9468     | 0.8362         | 1.0688         | 0.3925        | 2,349,733  |
| Alaska Natives - 2000+                 | 21.8  | 9.8  | 7.1      | 51       | 5     | 1.6587     | 0.5381         | 3.8758         | 0.3749        | 22,888     |
| Rural Georgia - 2000+                  | 14.8  | 7.4  | 4        | 38       | 4     | 1.1257     | 0.3065         | 2.8857         | 0.9501        | 26,980     |
| California excluding SF/SJM/LA - 2000+ | 11.8# | 0.5  | 10.9     | 12.9     | 535   | 0.8989     | 0.8175         | 0.987          | 0.025         | 4,518,777  |
| Kentucky - 2000+                       | 17.0# | 1.3  | 14.5     | 19.9     | 165   | 1.2946     | 1.0993         | 1.5157         | 0.0022        | 967,750    |
| Louisiana - 2000+                      | 15.8# | 1.3  | 13.3     | 18.5     | 150   | 1.1975     | 1.0089         | 1.4122         | 0.0394        | 951,092    |
| New Jersey - 2000+                     | 13.6  | 0.8  | 12.1     | 15.3     | 292   | 1.034      | 0.913          | 1.1675         | 0.6051        | 2,144,097  |
| Greater Georgia - 2000+                | 17.6# | 1.1  | 15.5     | 20       | 241   | 1.3369     | 1.1667         | 1.5261         | 0             | 1,368,750  |

| Age                                    | 42    | 42   | 42       | 42       | 42    | 42         | 42             | 42             | 42            | 42         |
|----------------------------------------|-------|------|----------|----------|-------|------------|----------------|----------------|---------------|------------|
|                                        | Rate  | SE   | Lower CI | Upper CI | Count | Rate Ratio | Ratio Lower CI | Ratio Upper CI | Ratio P-Value | Pop        |
| SEER 18                                | 14.5  | 0.3  | 14       | 15       | 2,858 |            |                |                |               | 19,717,232 |
| San Francisco-Oakland SMSA - 2000+     | 12.8  | 1.1  | 10.7     | 15.1     | 138   | 0.8814     | 0.7375         | 1.0458         | 0.155         | 1,080,222  |
| Connecticut - 2000+                    | 14.3  | 1.3  | 11.9     | 17       | 124   | 0.9849     | 0.8161         | 1.1791         | 0.9148        | 868,619    |
| Detroit (Metropolitan) - 2000+         | 17    | 1.3  | 14.5     | 19.8     | 161   | 1.1717     | 0.9934         | 1.3737         | 0.0598        | 947,958    |
| Hawaii - 2000+                         | 19.3# | 2.6  | 14.6     | 25.1     | 56    | 1.3345     | 1.0055         | 1.738          | 0.0458        | 289,506    |
| Iowa - 2000+                           | 14.8  | 1.5  | 12       | 18.1     | 96    | 1.0203     | 0.8237         | 1.2506         | 0.8749        | 649,111    |
| New Mexico - 2000+                     | 9.2#  | 1.5  | 6.5      | 12.6     | 39    | 0.6349     | 0.4505         | 0.8701         | 0.0032        | 423,771    |
| Seattle (Puget Sound) - 2000+          | 13.8  | 1.1  | 11.7     | 16.2     | 149   | 0.9506     | 0.8008         | 1.1211         | 0.5801        | 1,081,343  |
| Utah - 2000+                           | 12.9  | 1.6  | 10       | 16.5     | 65    | 0.8926     | 0.687          | 1.1412         | 0.3998        | 502,408    |
| Atlanta (Metropolitan) - 2000+         | 15.9  | 1.4  | 13.4     | 18.9     | 135   | 1.1        | 0.9186         | 1.3076         | 0.3003        | 846,695    |
| San Jose-Monterey - 2000+              | 15.6  | 1.6  | 12.6     | 19       | 95    | 1.0743     | 0.8663         | 1.3182         | 0.5196        | 610,051    |
| Los Angeles - 2000+                    | 13    | 0.7  | 11.6     | 14.6     | 305   | 0.9001     | 0.7972         | 1.0132         | 0.0827        | 2,337,785  |
| Alaska Natives - 2000+                 | 25.5  | 10.4 | 9.4      | 55.6     | 6     | 1.761      | 0.6457         | 3.8377         | 0.2613        | 23,506     |
| Rural Georgia - 2000+                  | 14.7  | 7.4  | 4        | 37.7     | 4     | 1.0153     | 0.2764         | 2.6024         | 1             | 27,180     |
| California excluding SF/SJM/LA - 2000+ | 13.1# | 0.5  | 12.1     | 14.2     | 596   | 0.9069     | 0.8289         | 0.9909         | 0.0303        | 4,533,833  |
| Kentucky - 2000+                       | 19.4# | 1.4  | 16.8     | 22.4     | 191   | 1.3407     | 1.1519         | 1.5527         | 0.0002        | 982,853    |
| Louisiana - 2000+                      | 15.9  | 1.3  | 13.5     | 18.6     | 153   | 1.095      | 0.9245         | 1.2888         | 0.2937        | 963,936    |
| New Jersey - 2000+                     | 14    | 0.8  | 12.4     | 15.6     | 303   | 0.9626     | 0.8523         | 1.084          | 0.5513        | 2,171,564  |
| Greater Georgia - 2000+                | 17.6# | 1.1  | 15.4     | 19.9     | 242   | 1.2125     | 1.059          | 1.383          | 0.0055        | 1,376,891  |
|                                        |       |      |          |          |       |            |                |                |               |            |
| Age                                    | 43    | 43   | 43       | 43       | 43    | 43         | 43             | 43             | 43            | 43         |
|                                        | Rate  | SE   | Lower CI | Upper CI | Count | Rate Ratio | Ratio Lower CI | Ratio Upper CI | Ratio P-Value | Pop        |
| SEER 18                                | 16.7  | 0.3  | 16.2     | 17.3     | 3,316 |            |                |                |               | 19,828,459 |
| San Francisco-Oakland SMSA - 2000+     | 15.6  | 1.2  | 13.3     | 18.1     | 168   | 0.9319     | 0.7933         | 1.0884         | 0.3949        | 1,077,990  |
| Connecticut - 2000+                    | 18.3  | 1.4  | 15.6     | 21.3     | 162   | 1.0943     | 0.9288         | 1.2815         | 0.2816        | 885,212    |
| Detroit (Metropolitan) - 2000+         | 15.5  | 1.3  | 13.1     | 18.2     | 149   | 0.9263     | 0.7807         | 1.0917         | 0.3833        | 961,899    |
| Hawaii - 2000+                         | 19.4  | 2.6  | 14.7     | 25.1     | 57    | 1.1582     | 0.8753         | 1.5044         | 0.3038        | 294,283    |
| Iowa - 2000+                           | 19.4  | 1.7  | 16.2     | 23.1     | 128   | 1.1601     | 0.9646         | 1.3843         | 0.1142        | 659,789    |
| New Mexico - 2000+                     | 13    | 1.7  | 9.8      | 16.9     | 56    | 0.7761     | 0.585          | 1.0104         | 0.0606        | 431,451    |
| Seattle (Puget Sound) - 2000+          | 13.9# | 1.1  | 11.8     | 16.3     | 152   | 0.8324     | 0.7028         | 0.9795         | 0.0262        | 1,091,950  |
| Utah - 2000+                           | 14.8  | 1.7  | 11.6     | 18.6     | 74    | 0.8851     | 0.6932         | 1.1143         | 0.3253        | 499,940    |
| Atlanta (Metropolitan) - 2000+         | 18    | 1.5  | 15.2     | 21.1     | 151   | 1.074      | 0.9063         | 1.2646         | 0.4123        | 840,698    |
| San Jose-Monterey - 2000+              | 16.2  | 1.6  | 13.2     | 19.7     | 99    | 0.9694     | 0.7856         | 1.184          | 0.8103        | 610,692    |
| Los Angeles - 2000+                    | 14.4# | 0.8  | 12.9     | 16       | 334   | 0.8585     | 0.7649         | 0.961          | 0.0074        | 2,326,329  |
| Alaska Natives - 2000+                 | 29.8  | 11.3 | 12       | 61.3     | 7     | 1.78       | 0.7151         | 3.6715         | 0.208         | 23,516     |
| Rural Georgia - 2000+                  | 10.9  | 6.3  | 2.2      | 31.7     | 3     | 0.6495     | 0.1339         | 1.8997         | 0.6455        | 27,621     |
| California excluding SF/SJM/LA - 2000+ | 15.2# | 0.6  | 14.1     | 16.4     | 694   | 0.9096     | 0.837          | 0.9875         | 0.0233        | 4,562,210  |
| Kentucky - 2000+                       | 23.0# | 1.5  | 20.1     | 26.2     | 228   | 1.3775     | 1.1992         | 1.5758         | 0             | 989,719    |
| Louisiana - 2000+                      | 20.2# | 1.4  | 17.4     | 23.2     | 197   | 1.2055     | 1.0387         | 1.3921         | 0.0142        | 977,217    |
| New Jersey - 2000+                     | 17.7  | 0.9  | 16       | 19.5     | 387   | 1.0578     | 0.9496         | 1.1755         | 0.3088        | 2,187,769  |
| Greater Georgia - 2000+                | 19.6# | 1.2  | 17.3     | 22       | 270   | 1.1698     | 1.0295         | 1.3246         | 0.0164        | 1,380,174  |

| Age                                    | 44    | 44   | 44       | 44       | 44    | 44         | 44             | 44             | 44            | 44         |
|----------------------------------------|-------|------|----------|----------|-------|------------|----------------|----------------|---------------|------------|
|                                        | Rate  | SE   | Lower CI | Upper CI | Count | Rate Ratio | Ratio Lower CI | Ratio Upper CI | Ratio P-Value | Pop        |
| SEER 18                                | 18.9  | 0.3  | 18.3     | 19.5     | 3,733 |            |                |                |               | 19,761,829 |
| San Francisco-Oakland SMSA - 2000+     | 19.6  | 1.4  | 17.1     | 22.5     | 210   | 1.0393     | 0.9001         | 1.1946         | 0.6063        | 1,069,670  |
| Connecticut - 2000+                    | 18.9  | 1.5  | 16.2     | 22       | 169   | 1.0017     | 0.8535         | 1.1689         | 1             | 893,157    |
| Detroit (Metropolitan) - 2000+         | 17.5  | 1.3  | 15       | 20.4     | 169   | 0.9281     | 0.7908         | 1.083          | 0.3633        | 963,967    |
| Hawaii - 2000+                         | 22.6  | 2.8  | 17.5     | 28.6     | 67    | 1.1938     | 0.9232         | 1.5198         | 0.1754        | 297,104    |
| Iowa - 2000+                           | 22.3  | 1.8  | 18.9     | 26.2     | 149   | 1.181      | 0.9959         | 1.3914         | 0.0558        | 667,863    |
| New Mexico - 2000+                     | 17.7  | 2    | 13.9     | 22.1     | 76    | 0.9361     | 0.7359         | 1.1747         | 0.6166        | 429,798    |
| Seattle (Puget Sound) - 2000+          | 17.2  | 1.3  | 14.8     | 19.8     | 187   | 0.9095     | 0.781          | 1.0536         | 0.2161        | 1,088,492  |
| Utah - 2000+                           | 14.2# | 1.7  | 11.1     | 18       | 70    | 0.7533     | 0.5859         | 0.954          | 0.0171        | 491,952    |
| Atlanta (Metropolitan) - 2000+         | 19.3  | 1.5  | 16.4     | 22.5     | 159   | 1.0193     | 0.8641         | 1.1948         | 0.8363        | 825,820    |
| San Jose-Monterey - 2000+              | 18.7  | 1.8  | 15.4     | 22.5     | 113   | 0.9899     | 0.8135         | 1.1937         | 0.9646        | 604,333    |
| Los Angeles - 2000+                    | 16.0# | 0.8  | 14.4     | 17.8     | 368   | 0.8484     | 0.7602         | 0.9446         | 0.0023        | 2,296,119  |
| Alaska Natives - 2000+                 | 63.6# | 16.4 | 35.6     | 104.9    | 15    | 3.3663     | 1.8822         | 5.5594         | 0.0001        | 23,589     |
| Rural Georgia - 2000+                  | 35.3  | 11.2 | 16.9     | 64.9     | 10    | 1.8668     | 0.8945         | 3.4371         | 0.0937        | 28,357     |
| California excluding SF/SJM/LA - 2000+ | 16.7# | 0.6  | 15.5     | 17.9     | 758   | 0.8817     | 0.8144         | 0.9536         | 0.0015        | 4,551,079  |
| Kentucky - 2000+                       | 25.2# | 1.6  | 22.1     | 28.5     | 249   | 1.3326     | 1.1675         | 1.5154         | 0             | 989,147    |
| Louisiana - 2000+                      | 21.8  | 1.5  | 18.9     | 24.9     | 213   | 1.152      | 0.9987         | 1.3229         | 0.0521        | 978,773    |
| New Jersey - 2000+                     | 20.1  | 1    | 18.2     | 22       | 439   | 1.0618     | 0.9597         | 1.1725         | 0.2455        | 2,188,638  |
| Greater Georgia - 2000+                | 22.7# | 1.3  | 20.3     | 25.4     | 312   | 1.2021     | 1.0675         | 1.3497         | 0.0025        | 1,373,971  |
|                                        |       |      |          |          |       |            |                |                |               |            |
| Age                                    | 45    | 45   | 45       | 45       | 45    | 45         | 45             | 45             | 45            | 45         |
|                                        | Rate  | SE   | Lower CI | Upper CI | Count | Rate Ratio | Ratio Lower CI | Ratio Upper CI | Ratio P-Value | Pop        |
| SEER 18                                | 21.8  | 0.3  | 21.1     | 22.5     | 4,284 |            |                |                |               | 19,660,161 |
| San Francisco-Oakland SMSA - 2000+     | 19    | 1.3  | 16.4     | 21.8     | 202   | 0.8703     | 0.752          | 1.0024         | 0.0541        | 1,065,219  |
| Connecticut - 2000+                    | 21.8  | 1.6  | 18.9     | 25.1     | 195   | 1.0022     | 0.8637         | 1.1571         | 0.9962        | 892,914    |
| Detroit (Metropolitan) - 2000+         | 21.1  | 1.5  | 18.3     | 24.2     | 203   | 0.9693     | 0.8379         | 1.1161         | 0.6971        | 961,083    |
| Hawaii - 2000+                         | 24.4  | 2.9  | 19.2     | 30.7     | 73    | 1.122      | 0.8778         | 1.4138         | 0.3591        | 298,585    |
| Iowa - 2000+                           | 20.8  | 1.8  | 17.5     | 24.6     | 140   | 0.9562     | 0.8022         | 1.1317         | 0.6389        | 671,911    |
| New Mexico - 2000+                     | 23    | 2.3  | 18.7     | 28       | 100   | 1.0568     | 0.8579         | 1.2885         | 0.6125        | 434,267    |
| Seattle (Puget Sound) - 2000+          | 20.7  | 1.4  | 18       | 23.5     | 224   | 0.9479     | 0.825          | 1.0844         | 0.4577        | 1,084,467  |
| Utah - 2000+                           | 19.2  | 2    | 15.5     | 23.5     | 93    | 0.8791     | 0.708          | 1.0796         | 0.2349        | 485,488    |
| Atlanta (Metropolitan) - 2000+         | 22.7  | 1.7  | 19.5     | 26.2     | 183   | 1.0404     | 0.8924         | 1.2065         | 0.6203        | 807,202    |
| San Jose-Monterey - 2000+              | 18.5  | 1.8  | 15.2     | 22.4     | 110   | 0.8512     | 0.6979         | 1.0287         | 0.0989        | 593,041    |
| Los Angeles - 2000+                    | 19.6# | 0.9  | 17.8     | 21.5     | 445   | 0.8993     | 0.8138         | 0.9917         | 0.033         | 2,270,942  |
| Alaska Natives - 2000+                 | 79.9# | 18.3 | 48.1     | 124.8    | 19    | 3.6675     | 2.2059         | 5.7344         | 0             | 23,775     |
| Rural Georgia - 2000+                  | 35.4  | 11.2 | 17       | 65.1     | 10    | 1.6237     | 0.7781         | 2.989          | 0.1911        | 28,264     |
| California excluding SF/SJM/LA - 2000+ | 18.9# | 0.6  | 17.7     | 20.2     | 855   | 0.8675     | 0.8051         | 0.9338         | 0.0001        | 4,523,193  |
| Kentucky - 2000+                       | 30.3# | 1.7  | 26.9     | 33.9     | 301   | 1.3892     | 1.2318         | 1.5618         | 0             | 994,368    |
| Louisiana - 2000+                      | 25.5# | 1.6  | 22.4     | 28.8     | 251   | 1.1686     | 1.0248         | 1.3275         | 0.0202        | 985,693    |
| New Jersey - 2000+                     | 23.1  | 1    | 21.1     | 25.2     | 504   | 1.0611     | 0.9656         | 1.164          | 0.2179        | 2,179,774  |
| Greater Georgia - 2000+                | 27.6# | 1.4  | 24.9     | 30.6     | 376   | 1.2688     | 1.1388         | 1.4102         | 0             | 1,359,975  |



| Age                                    | 46    | 46   | 46       | 46       | 46    | 46         | 46             | 46             | 46            | 46         |
|----------------------------------------|-------|------|----------|----------|-------|------------|----------------|----------------|---------------|------------|
|                                        | Rate  | SE   | Lower CI | Upper CI | Count | Rate Ratio | Ratio Lower CI | Ratio Upper CI | Ratio P-Value | Pop        |
| SEER 18                                | 25.1  | 0.4  | 24.4     | 25.8     | 4,901 |            |                |                |               | 19,553,725 |
| San Francisco-Oakland SMSA - 2000+     | 23.3  | 1.5  | 20.4     | 26.4     | 245   | 0.9285     | 0.8134         | 1.0558         | 0.2697        | 1,052,735  |
| Connecticut - 2000+                    | 25.1  | 1.7  | 22       | 28.7     | 225   | 1.0034     | 0.874          | 1.147          | 0.9794        | 894,663    |
| Detroit (Metropolitan) - 2000+         | 24.4  | 1.6  | 21.4     | 27.7     | 234   | 0.973      | 0.8497         | 1.1096         | 0.7134        | 959,501    |
| Hawaii - 2000+                         | 28.8  | 3.1  | 23.1     | 35.6     | 86    | 1.1498     | 0.918          | 1.4229         | 0.2234        | 298,425    |
| Iowa - 2000+                           | 26.2  | 2    | 22.5     | 30.4     | 177   | 1.0459     | 0.8951         | 1.2152         | 0.5785        | 675,218    |
| New Mexico - 2000+                     | 24.6  | 2.4  | 20.2     | 29.7     | 107   | 0.9819     | 0.803          | 1.1892         | 0.902         | 434,766    |
| Seattle (Puget Sound) - 2000+          | 19.7# | 1.3  | 17.1     | 22.5     | 213   | 0.7849     | 0.6811         | 0.9005         | 0.0004        | 1,082,699  |
| Utah - 2000+                           | 22.5  | 2.2  | 18.4     | 27.2     | 108   | 0.8973     | 0.7345         | 1.0858         | 0.2842        | 480,211    |
| Atlanta (Metropolitan) - 2000+         | 26.7  | 1.8  | 23.2     | 30.5     | 212   | 1.0637     | 0.9226         | 1.2206         | 0.3969        | 795,203    |
| San Jose-Monterey - 2000+              | 21.5  | 1.9  | 17.9     | 25.6     | 127   | 0.8586     | 0.7142         | 1.0241         | 0.0929        | 590,129    |
| Los Angeles - 2000+                    | 23.4  | 1    | 21.4     | 25.5     | 523   | 0.9328     | 0.8508         | 1.0211         | 0.1344        | 2,236,897  |
| Alaska Natives - 2000+                 | 59.3# | 15.8 | 32.4     | 99.5     | 14    | 2.3651     | 1.2921         | 3.9721         | 0.0065        | 23,617     |
| Rural Georgia - 2000+                  | 49.4# | 13.2 | 27       | 82.8     | 14    | 1.9701     | 1.0763         | 3.3087         | 0.029         | 28,352     |
| California excluding SF/SJM/LA - 2000+ | 22.7# | 0.7  | 21.3     | 24.1     | 1,019 | 0.9051     | 0.8452         | 0.9685         | 0.0036        | 4,491,986  |
| Kentucky - 2000+                       | 31.7# | 1.8  | 28.3     | 35.4     | 315   | 1.263      | 1.1235         | 1.4157         | 0.0001        | 995,039    |
| Louisiana - 2000+                      | 30.6# | 1.8  | 27.3     | 34.3     | 303   | 1.2211     | 1.0838         | 1.3716         | 0.0011        | 989,986    |
| New Jersey - 2000+                     | 26    | 1.1  | 23.9     | 28.3     | 565   | 1.0379     | 0.9497         | 1.1326         | 0.4138        | 2,171,852  |
| Greater Georgia - 2000+                | 30.6# | 1.5  | 27.7     | 33.7     | 414   | 1.2213     | 1.1021         | 1.3505         | 0.0002        | 1,352,446  |
|                                        |       |      |          |          |       |            |                |                |               |            |
| Age                                    | 47    | 47   | 47       | 47       | 47    | 47         | 47             | 47             | 47            | 47         |
|                                        | Rate  | SE   | Lower CI | Upper CI | Count | Rate Ratio | Ratio Lower CI | Ratio Upper CI | Ratio P-Value | Pop        |
| SEER 18                                | 27.5  | 0.4  | 26.7     | 28.2     | 5,341 |            |                |                |               | 19,457,148 |
| San Francisco-Oakland SMSA - 2000+     | 24.3  | 1.5  | 21.4     | 27.5     | 254   | 0.8843     | 0.7766         | 1.0031         | 0.0561        | 1,046,382  |
| Connecticut - 2000+                    | 26.3  | 1.7  | 23.1     | 29.9     | 236   | 0.9599     | 0.839          | 1.0938         | 0.5647        | 895,643    |
| Detroit (Metropolitan) - 2000+         | 28.8  | 1.7  | 25.5     | 32.4     | 276   | 1.0487     | 0.9258         | 1.1838         | 0.4574        | 958,771    |
| Hawaii - 2000+                         | 37.6# | 3.6  | 31       | 45.3     | 112   | 1.3704     | 1.1262         | 1.6524         | 0.0019        | 297,741    |
| Iowa - 2000+                           | 29.1  | 2.1  | 25.2     | 33.5     | 198   | 1.0613     | 0.9163         | 1.2233         | 0.4295        | 679,617    |
| New Mexico - 2000+                     | 19.9# | 2.1  | 15.9     | 24.6     | 87    | 0.7251     | 0.5798         | 0.8961         | 0.0021        | 437,101    |
| Seattle (Puget Sound) - 2000+          | 27.3  | 1.6  | 24.3     | 30.6     | 296   | 0.9939     | 0.8811         | 1.1175         | 0.9485        | 1,084,987  |
| Utah - 2000+                           | 23.3  | 2.2  | 19.1     | 28       | 111   | 0.8478     | 0.6961         | 1.0231         | 0.0877        | 476,974    |
| Atlanta (Metropolitan) - 2000+         | 25.3  | 1.8  | 21.9     | 29.1     | 198   | 0.9215     | 0.7955         | 1.062          | 0.2721        | 782,792    |
| San Jose-Monterey - 2000+              | 25.1  | 2.1  | 21.2     | 29.5     | 146   | 0.9148     | 0.7707         | 1.0783         | 0.3063        | 581,437    |
| Los Angeles - 2000+                    | 25.6  | 1.1  | 23.6     | 27.8     | 565   | 0.9343     | 0.8552         | 1.0191         | 0.1276        | 2,203,128  |
| Alaska Natives - 2000+                 | 46.7  | 14.1 | 23.3     | 83.5     | 11    | 1.7004     | 0.8483         | 3.045          | 0.1306        | 23,566     |
| Rural Georgia - 2000+                  | 38.7  | 11.7 | 19.3     | 69.3     | 11    | 1.4115     | 0.7042         | 2.5276         | 0.3288        | 28,390     |
| California excluding SF/SJM/LA - 2000+ | 24.6# | 0.7  | 23.1     | 26.1     | 1,096 | 0.8951     | 0.838          | 0.9554         | 0.0008        | 4,460,695  |
| Kentucky - 2000+                       | 34.9# | 1.9  | 31.3     | 38.8     | 348   | 1.2717     | 1.1377         | 1.4176         | 0             | 996,905    |
| Louisiana - 2000+                      | 37.2# | 1.9  | 33.5     | 41.2     | 369   | 1.3538     | 1.2149         | 1.5047         | 0             | 992,963    |
| New Jersey - 2000+                     | 28    | 1.1  | 25.8     | 30.3     | 606   | 1.021      | 0.9371         | 1.1107         | 0.6407        | 2,162,333  |
| Greater Georgia - 2000+                | 31.2# | 1.5  | 28.3     | 34.4     | 421   | 1.138      | 1.0281         | 1.2569         | 0.0128        | 1,347,723  |

| Age                                    | 48    | 48   | 48       | 48       | 48    | 48         | 48             | 48             | 48            | 48         |
|----------------------------------------|-------|------|----------|----------|-------|------------|----------------|----------------|---------------|------------|
|                                        | Rate  | SE   | Lower CI | Upper CI | Count | Rate Ratio | Ratio Lower CI | Ratio Upper CI | Ratio P-Value | Pop        |
| SEER 18                                | 31.3  | 0.4  | 30.5     | 32.1     | 6,035 |            |                |                |               | 19,286,247 |
| San Francisco-Oakland SMSA - 2000+     | 27.3# | 1.6  | 24.2     | 30.7     | 282   | 0.8724     | 0.7715         | 0.9832         | 0.0245        | 1,032,981  |
| Connecticut - 2000+                    | 31.5  | 1.9  | 27.9     | 35.4     | 279   | 1.0064     | 0.8894         | 1.135          | 0.9335        | 885,902    |
| Detroit (Metropolitan) - 2000+         | 32.9  | 1.9  | 29.4     | 36.8     | 315   | 1.052      | 0.9364         | 1.1784         | 0.3948        | 956,854    |
| Hawaii - 2000+                         | 36.7  | 3.5  | 30.2     | 44.3     | 110   | 1.1733     | 0.9627         | 1.4168         | 0.1127        | 299,613    |
| Iowa - 2000+                           | 32    | 2.2  | 27.9     | 36.5     | 219   | 1.0217     | 0.8887         | 1.1693         | 0.774         | 685,008    |
| New Mexico - 2000+                     | 28.9  | 2.6  | 24.1     | 34.3     | 128   | 0.9229     | 0.7686         | 1.0996         | 0.3944        | 443,212    |
| Seattle (Puget Sound) - 2000+          | 27.7# | 1.6  | 24.6     | 31       | 297   | 0.8845     | 0.7846         | 0.9939         | 0.0388        | 1,073,077  |
| Utah - 2000+                           | 25.0# | 2.3  | 20.7     | 29.9     | 118   | 0.7991     | 0.6603         | 0.9588         | 0.0145        | 471,894    |
| Atlanta (Metropolitan) - 2000+         | 30.7  | 2    | 26.9     | 34.8     | 236   | 0.9799     | 0.8568         | 1.1162         | 0.7925        | 769,630    |
| San Jose-Monterey - 2000+              | 31.8  | 2.4  | 27.3     | 36.8     | 182   | 1.0162     | 0.872          | 1.1778         | 0.8516        | 572,358    |
| Los Angeles - 2000+                    | 27.9# | 1.1  | 25.7     | 30.2     | 604   | 0.8925     | 0.8195         | 0.9705         | 0.0073        | 2,162,804  |
| Alaska Natives - 2000+                 | 69.3# | 17.3 | 39.6     | 112.6    | 16    | 2.2161     | 1.2659         | 3.6018         | 0.0065        | 23,073     |
| Rural Georgia - 2000+                  | 27.4  | 9.7  | 11.8     | 54       | 8     | 0.8761     | 0.3781         | 1.7275         | 0.8773        | 29,180     |
| California excluding SF/SJM/LA - 2000+ | 28.2# | 0.8  | 26.7     | 29.9     | 1,246 | 0.9028     | 0.8487         | 0.9597         | 0.0009        | 4,410,715  |
| Kentucky - 2000+                       | 39.1# | 2    | 35.3     | 43.2     | 390   | 1.2506     | 1.126          | 1.3857         | 0             | 996,579    |
| Louisiana - 2000+                      | 41.2# | 2    | 37.3     | 45.4     | 409   | 1.3162     | 1.1878         | 1.455          | 0             | 993,076    |
| New Jersey - 2000+                     | 32.7  | 1.2  | 30.3     | 35.2     | 701   | 1.0454     | 0.9654         | 1.1306         | 0.2752        | 2,142,948  |
| Greater Georgia - 2000+                | 37.0# | 1.7  | 33.8     | 40.4     | 495   | 1.1829     | 1.0771         | 1.2966         | 0.0005        | 1,337,343  |
|                                        |       |      |          |          |       |            |                |                |               |            |
| Age                                    | 49    | 49   | 49       | 49       | 49    | 49         | 49             | 49             | 49            | 49         |
|                                        | Rate  | SE   | Lower CI | Upper CI | Count | Rate Ratio | Ratio Lower CI | Ratio Upper CI | Ratio P-Value | Pop        |
| SEER 18                                | 34.9  | 0.4  | 34.1     | 35.8     | 6,689 |            |                |                |               | 19,163,643 |
| San Francisco-Oakland SMSA - 2000+     | 33.3  | 1.8  | 29.9     | 37       | 342   | 0.9546     | 0.8538         | 1.0643         | 0.4186        | 1,026,440  |
| Connecticut - 2000+                    | 34.4  | 2    | 30.7     | 38.5     | 304   | 0.9866     | 0.8766         | 1.107          | 0.8477        | 882,754    |
| Detroit (Metropolitan) - 2000+         | 34.4  | 1.9  | 30.8     | 38.3     | 327   | 0.985      | 0.8788         | 1.1008         | 0.8177        | 951,094    |
| Hawaii - 2000+                         | 42    | 3.7  | 35       | 50       | 126   | 1.2022     | 0.9999         | 1.434          | 0.0502        | 300,260    |
| Iowa - 2000+                           | 32.9  | 2.2  | 28.7     | 37.4     | 226   | 0.9414     | 0.8208         | 1.0749         | 0.3907        | 687,816    |
| New Mexico - 2000+                     | 31.1  | 2.6  | 26.1     | 36.7     | 138   | 0.8896     | 0.7461         | 1.053          | 0.1832        | 444,438    |
| Seattle (Puget Sound) - 2000+          | 30.5# | 1.7  | 27.3     | 34       | 327   | 0.8731     | 0.779          | 0.9758         | 0.0159        | 1,072,992  |
| Utah - 2000+                           | 25.2# | 2.3  | 20.9     | 30.2     | 118   | 0.7228     | 0.5973         | 0.8671         | 0.0003        | 467,739    |
| Atlanta (Metropolitan) - 2000+         | 32.8  | 2.1  | 28.9     | 37.2     | 248   | 0.9401     | 0.8248         | 1.0673         | 0.3561        | 755,790    |
| San Jose-Monterey - 2000+              | 32    | 2.4  | 27.5     | 37       | 181   | 0.9171     | 0.7868         | 1.0631         | 0.2641        | 565,456    |
| Los Angeles - 2000+                    | 31.5# | 1.2  | 29.1     | 33.9     | 671   | 0.9012     | 0.8312         | 0.9758         | 0.0099        | 2,133,069  |
| Alaska Natives - 2000+                 | 70.0# | 17.5 | 40       | 113.6    | 16    | 2.0049     | 1.1453         | 3.2582         | 0.0162        | 22,864     |
| Rural Georgia - 2000+                  | 67.9# | 15.2 | 41.4     | 104.8    | 20    | 1.9441     | 1.1867         | 3.0049         | 0.0094        | 29,474     |
| California excluding SF/SJM/LA - 2000+ | 32.3# | 0.9  | 30.7     | 34.1     | 1,418 | 0.9265     | 0.8743         | 0.9813         | 0.0089        | 4,384,758  |
| Kentucky - 2000+                       | 47.1# | 2.2  | 42.9     | 51.5     | 468   | 1.3482     | 1.2249         | 1.4808         | 0             | 994,544    |
| Louisiana - 2000+                      | 47.5# | 2.2  | 43.3     | 52       | 472   | 1.3614     | 1.2375         | 1.4949         | 0             | 993,252    |
| New Jersey - 2000+                     | 34.3  | 1.3  | 31.9     | 36.9     | 729   | 0.9829     | 0.9093         | 1.0612         | 0.676         | 2,124,823  |
| Greater Georgia - 2000+                | 42.1# | 1.8  | 38.7     | 45.7     | 558   | 1.2055     | 1.1038         | 1.3145         | 0             | 1,326,080  |

|                                        |        |      |          |          |       |            |                |                |               |            |
|----------------------------------------|--------|------|----------|----------|-------|------------|----------------|----------------|---------------|------------|
|                                        |        |      |          |          |       |            |                |                |               |            |
| Age                                    | 50     | 50   | 50       | 50       | 50    | 50         | 50             | 50             | 50            | 50         |
|                                        | Rate   | SE   | Lower CI | Upper CI | Count | Rate Ratio | Ratio Lower CI | Ratio Upper CI | Ratio P-Value | Pop        |
| SEER 18                                | 51     | 0.5  | 50       | 52.1     | 9,654 |            |                |                |               | 18,918,753 |
| San Francisco-Oakland SMSA - 2000+     | 51     | 2.2  | 46.7     | 55.5     | 520   | 0.9989     | 0.9128         | 1.0912         | 1             | 1,020,161  |
| Connecticut - 2000+                    | 62.5#  | 2.7  | 57.3     | 68       | 543   | 1.2243     | 1.1208         | 1.335          | 0             | 869,169    |
| Detroit (Metropolitan) - 2000+         | 49     | 2.3  | 44.6     | 53.7     | 461   | 0.96       | 0.8725         | 1.0542         | 0.4062        | 941,046    |
| Hawaii - 2000+                         | 65.9#  | 4.7  | 57.1     | 75.7     | 200   | 1.291      | 1.1167         | 1.4852         | 0.0006        | 303,584    |
| Iowa - 2000+                           | 55.5   | 2.8  | 50.1     | 61.4     | 382   | 1.0885     | 0.9802         | 1.2059         | 0.1125        | 687,709    |
| New Mexico - 2000+                     | 35.4#  | 2.8  | 30       | 41.3     | 157   | 0.6928     | 0.5879         | 0.8111         | 0             | 444,104    |
| Seattle (Puget Sound) - 2000+          | 46.4#  | 2.1  | 42.4     | 50.7     | 494   | 0.9102     | 0.8298         | 0.9964         | 0.0413        | 1,063,628  |
| Utah - 2000+                           | 49.7   | 3.3  | 43.5     | 56.6     | 229   | 0.9749     | 0.8514         | 1.1115         | 0.735         | 460,336    |
| Atlanta (Metropolitan) - 2000+         | 49.9   | 2.6  | 44.9     | 55.2     | 368   | 0.9773     | 0.8783         | 1.0846         | 0.6894        | 737,930    |
| San Jose-Monterey - 2000+              | 55.3   | 3.2  | 49.3     | 61.9     | 307   | 1.0845     | 0.9648         | 1.2151         | 0.1734        | 554,757    |
| Los Angeles - 2000+                    | 47.6#  | 1.5  | 44.7     | 50.6     | 997   | 0.9323     | 0.8726         | 0.9952         | 0.0352        | 2,095,680  |
| Alaska Natives - 2000+                 | 106.0# | 21.6 | 67.9     | 157.8    | 24    | 2.0781     | 1.3308         | 3.094          | 0.0018        | 22,632     |
| Rural Georgia - 2000+                  | 68.4   | 15.3 | 41.8     | 105.6    | 20    | 1.34       | 0.8182         | 2.0708         | 0.2418        | 29,248     |
| California excluding SF/SJM/LA - 2000+ | 44.9#  | 1    | 42.9     | 46.9     | 1,938 | 0.879      | 0.8367         | 0.923          | 0             | 4,320,725  |
| Kentucky - 2000+                       | 61.6#  | 2.5  | 56.8     | 66.7     | 609   | 1.2074     | 1.1106         | 1.3105         | 0             | 988,469    |
| Louisiana - 2000+                      | 59.4#  | 2.5  | 54.7     | 64.5     | 586   | 1.1649     | 1.0698         | 1.2663         | 0.0005        | 985,852    |
| New Jersey - 2000+                     | 49.7   | 1.5  | 46.7     | 52.8     | 1,037 | 0.974      | 0.9127         | 1.0386         | 0.431         | 2,086,372  |
| Greater Georgia - 2000+                | 59.8#  | 2.1  | 55.7     | 64.2     | 782   | 1.1722     | 1.0884         | 1.2609         | 0             | 1,307,351  |
|                                        |        |      |          |          |       |            |                |                |               |            |
| Age                                    | 51     | 51   | 51       | 51       | 51    | 51         | 51             | 51             | 51            | 51         |
|                                        | Rate   | SE   | Lower CI | Upper CI | Count | Rate Ratio | Ratio Lower CI | Ratio Upper CI | Ratio P-Value | Pop        |
| SEER 18                                | 51.5   | 0.5  | 50.5     | 52.6     | 9,639 |            |                |                |               | 18,700,852 |
| San Francisco-Oakland SMSA - 2000+     | 51.7   | 2.3  | 47.4     | 56.4     | 522   | 1.0036     | 0.9173         | 1.0962         | 0.9484        | 1,009,088  |
| Connecticut - 2000+                    | 58.1#  | 2.6  | 53.1     | 63.4     | 500   | 1.127      | 1.0281         | 1.2332         | 0.0109        | 860,737    |
| Detroit (Metropolitan) - 2000+         | 49.2   | 2.3  | 44.8     | 53.9     | 460   | 0.9546     | 0.8675         | 1.0483         | 0.3424        | 934,893    |
| Hawaii - 2000+                         | 69.6#  | 4.8  | 60.5     | 79.7     | 209   | 1.35       | 1.1715         | 1.5484         | 0             | 300,359    |
| Iowa - 2000+                           | 53.8   | 2.8  | 48.5     | 59.6     | 368   | 1.044      | 0.9382         | 1.1586         | 0.4317        | 683,899    |
| New Mexico - 2000+                     | 46.6   | 3.2  | 40.5     | 53.4     | 206   | 0.9042     | 0.7838         | 1.0381         | 0.1593        | 441,993    |
| Seattle (Puget Sound) - 2000+          | 42.5#  | 2    | 38.6     | 46.6     | 450   | 0.8237     | 0.7478         | 0.9055         | 0             | 1,059,863  |
| Utah - 2000+                           | 45.6   | 3.2  | 39.6     | 52.3     | 208   | 0.8852     | 0.7679         | 1.0156         | 0.0838        | 455,868    |
| Atlanta (Metropolitan) - 2000+         | 51.9   | 2.7  | 46.8     | 57.5     | 374   | 1.0072     | 0.9059         | 1.1169         | 0.9066        | 720,436    |
| San Jose-Monterey - 2000+              | 48     | 3    | 42.4     | 54.2     | 263   | 0.9317     | 0.8211         | 1.0532         | 0.2694        | 547,664    |
| Los Angeles - 2000+                    | 46.2#  | 1.5  | 43.3     | 49.2     | 950   | 0.8959     | 0.8373         | 0.9578         | 0.0011        | 2,057,251  |
| Alaska Natives - 2000+                 | 114.2# | 22.8 | 73.9     | 168.6    | 25    | 2.2162     | 1.4335         | 3.2735         | 0.0006        | 21,886     |
| Rural Georgia - 2000+                  | 55     | 13.7 | 31.4     | 89.3     | 16    | 1.067      | 0.6097         | 1.7337         | 0.8631        | 29,092     |
| California excluding SF/SJM/LA - 2000+ | 47.9#  | 1.1  | 45.8     | 50       | 2,041 | 0.9292     | 0.8854         | 0.9748         | 0.0025        | 4,261,477  |
| Kentucky - 2000+                       | 64.4#  | 2.6  | 59.4     | 69.6     | 632   | 1.2486     | 1.1502         | 1.3534         | 0             | 982,021    |
| Louisiana - 2000+                      | 61.8#  | 2.5  | 57       | 66.9     | 607   | 1.1989     | 1.1027         | 1.3016         | 0             | 982,240    |
| New Jersey - 2000+                     | 49.7   | 1.6  | 46.7     | 52.8     | 1,024 | 0.9641     | 0.9031         | 1.0284         | 0.2728        | 2,060,625  |
| Greater Georgia - 2000+                | 60.7#  | 2.2  | 56.5     | 65.1     | 784   | 1.1778     | 1.0937         | 1.2669         | 0             | 1,291,460  |

|                                        |        |      |          |          |       |            |                |                |               |            |
|----------------------------------------|--------|------|----------|----------|-------|------------|----------------|----------------|---------------|------------|
|                                        |        |      |          |          |       |            |                |                |               |            |
| Age                                    | 52     | 52   | 52       | 52       | 52    | 52         | 52             | 52             | 52            | 52         |
|                                        | Rate   | SE   | Lower CI | Upper CI | Count | Rate Ratio | Ratio Lower CI | Ratio Upper CI | Ratio P-Value | Pop        |
| SEER 18                                | 50.6   | 0.5  | 49.5     | 51.6     | 9,267 |            |                |                |               | 18,326,266 |
| San Francisco-Oakland SMSA - 2000+     | 47     | 2.2  | 42.8     | 51.5     | 466   | 0.9294     | 0.845          | 1.0201         | 0.1262        | 991,576    |
| Connecticut - 2000+                    | 48.5   | 2.4  | 43.9     | 53.5     | 409   | 0.9597     | 0.8671         | 1.0598         | 0.4318        | 842,774    |
| Detroit (Metropolitan) - 2000+         | 52.2   | 2.4  | 47.6     | 57.1     | 481   | 1.032      | 0.9397         | 1.1312         | 0.5129        | 921,707    |
| Hawaii - 2000+                         | 60.7#  | 4.5  | 52.1     | 70.2     | 180   | 1.2001     | 1.0297         | 1.3909         | 0.0199        | 296,609    |
| Iowa - 2000+                           | 48.4   | 2.7  | 43.3     | 53.9     | 327   | 0.9564     | 0.854          | 1.0681         | 0.447         | 676,116    |
| New Mexico - 2000+                     | 45.4   | 3.2  | 39.3     | 52.2     | 199   | 0.8977     | 0.7761         | 1.0331         | 0.1371        | 438,396    |
| Seattle (Puget Sound) - 2000+          | 44.8#  | 2.1  | 40.9     | 49.1     | 467   | 0.8865     | 0.8061         | 0.9729         | 0.0105        | 1,041,803  |
| Utah - 2000+                           | 45.7   | 3.2  | 39.6     | 52.4     | 204   | 0.903      | 0.7822         | 1.0375         | 0.1558        | 446,758    |
| Atlanta (Metropolitan) - 2000+         | 50.3   | 2.7  | 45.2     | 55.8     | 351   | 0.9947     | 0.8916         | 1.1067         | 0.95          | 697,849    |
| San Jose-Monterey - 2000+              | 48.1   | 3    | 42.4     | 54.3     | 256   | 0.9508     | 0.8365         | 1.0767         | 0.4468        | 532,437    |
| Los Angeles - 2000+                    | 48.8   | 1.6  | 45.8     | 52       | 978   | 0.9658     | 0.9033         | 1.0317         | 0.3079        | 2,002,625  |
| Alaska Natives - 2000+                 | 106.1# | 22.6 | 66.5     | 160.7    | 22    | 2.0986     | 1.3146         | 3.1793         | 0.0025        | 20,731     |
| Rural Georgia - 2000+                  | 58.8   | 14.3 | 34.2     | 94.1     | 17    | 1.1624     | 0.6768         | 1.8621         | 0.6013        | 28,923     |
| California excluding SF/SJM/LA - 2000+ | 44.1#  | 1    | 42.2     | 46.2     | 1,842 | 0.873      | 0.83           | 0.9179         | 0             | 4,172,446  |
| Kentucky - 2000+                       | 65.7#  | 2.6  | 60.7     | 71       | 636   | 1.3        | 1.1977         | 1.4089         | 0             | 967,529    |
| Louisiana - 2000+                      | 66.2#  | 2.6  | 61.2     | 71.6     | 639   | 1.31       | 1.2072         | 1.4196         | 0             | 964,607    |
| New Jersey - 2000+                     | 52.1   | 1.6  | 49       | 55.3     | 1,051 | 1.0303     | 0.9657         | 1.0983         | 0.3672        | 2,017,302  |
| Greater Georgia - 2000+                | 58.6#  | 2.2  | 54.5     | 63       | 742   | 1.159      | 1.074          | 1.2491         | 0.0002        | 1,266,078  |
|                                        |        |      |          |          |       |            |                |                |               |            |
| Age                                    | 53     | 53   | 53       | 53       | 53    | 53         | 53             | 53             | 53            | 53         |
|                                        | Rate   | SE   | Lower CI | Upper CI | Count | Rate Ratio | Ratio Lower CI | Ratio Upper CI | Ratio P-Value | Pop        |
| SEER 18                                | 53.8   | 0.5  | 52.7     | 54.9     | 9,721 |            |                |                |               | 18,073,808 |
| San Francisco-Oakland SMSA - 2000+     | 47.0#  | 2.2  | 42.8     | 51.5     | 460   | 0.8744     | 0.7946         | 0.9603         | 0.0045        | 978,083    |
| Connecticut - 2000+                    | 53.6   | 2.5  | 48.7     | 58.8     | 447   | 0.9957     | 0.9036         | 1.0948         | 0.9536        | 834,699    |
| Detroit (Metropolitan) - 2000+         | 52.8   | 2.4  | 48.2     | 57.8     | 482   | 0.9826     | 0.8948         | 1.0768         | 0.7281        | 912,063    |
| Hawaii - 2000+                         | 60.1   | 4.5  | 51.6     | 69.6     | 177   | 1.117      | 0.9572         | 1.296          | 0.1595        | 294,630    |
| Iowa - 2000+                           | 53.3   | 2.8  | 47.9     | 59.1     | 357   | 0.9911     | 0.8892         | 1.1016         | 0.8952        | 669,745    |
| New Mexico - 2000+                     | 51.3   | 3.4  | 44.8     | 58.4     | 223   | 0.953      | 0.8308         | 1.0884         | 0.5017        | 435,054    |
| Seattle (Puget Sound) - 2000+          | 45.5#  | 2.1  | 41.5     | 49.8     | 469   | 0.8458     | 0.7693         | 0.928          | 0.0003        | 1,030,958  |
| Utah - 2000+                           | 47     | 3.3  | 40.8     | 53.8     | 206   | 0.8734     | 0.7571         | 1.0027         | 0.0549        | 438,509    |
| Atlanta (Metropolitan) - 2000+         | 51.1   | 2.7  | 45.9     | 56.8     | 349   | 0.9508     | 0.852          | 1.058          | 0.369         | 682,470    |
| San Jose-Monterey - 2000+              | 49     | 3.1  | 43.2     | 55.3     | 257   | 0.9106     | 0.8014         | 1.0307         | 0.1433        | 524,748    |
| Los Angeles - 2000+                    | 50.5   | 1.6  | 47.4     | 53.7     | 988   | 0.9383     | 0.878          | 1.0019         | 0.0572        | 1,957,690  |
| Alaska Natives - 2000+                 | 124.4# | 24.9 | 80.5     | 183.6    | 25    | 2.313      | 1.4961         | 3.4165         | 0.0003        | 20,096     |
| Rural Georgia - 2000+                  | 88.5#  | 17.4 | 57.8     | 129.6    | 26    | 1.6451     | 1.0741         | 2.412          | 0.023         | 29,384     |
| California excluding SF/SJM/LA - 2000+ | 47.9#  | 1.1  | 45.8     | 50.1     | 1,966 | 0.8906     | 0.848          | 0.9349         | 0             | 4,104,338  |
| Kentucky - 2000+                       | 66.4#  | 2.6  | 61.3     | 71.8     | 638   | 1.2345     | 1.1377         | 1.3376         | 0             | 960,848    |
| Louisiana - 2000+                      | 68.5#  | 2.7  | 63.4     | 74       | 657   | 1.2742     | 1.1756         | 1.3791         | 0             | 958,674    |
| New Jersey - 2000+                     | 56.6   | 1.7  | 53.4     | 60       | 1,128 | 1.0527     | 0.9889         | 1.1198         | 0.1073        | 1,992,215  |
| Greater Georgia - 2000+                | 69.3#  | 2.4  | 64.8     | 74.1     | 866   | 1.2885     | 1.2006         | 1.3814         | 0             | 1,249,604  |

| Age                                    | 54     | 54   | 54       | 54       | 54     | 54         | 54             | 54             | 54            | 54         |
|----------------------------------------|--------|------|----------|----------|--------|------------|----------------|----------------|---------------|------------|
|                                        | Rate   | SE   | Lower CI | Upper CI | Count  | Rate Ratio | Ratio Lower CI | Ratio Upper CI | Ratio P-Value | Pop        |
| SEER 18                                | 58.2   | 0.6  | 57.1     | 59.4     | 10,245 |            |                |                |               | 17,590,040 |
| San Francisco-Oakland SMSA - 2000+     | 54.6   | 2.4  | 50       | 59.5     | 520    | 0.9379     | 0.8572         | 1.0244         | 0.1584        | 951,891    |
| Connecticut - 2000+                    | 57.8   | 2.7  | 52.7     | 63.3     | 471    | 0.993      | 0.9035         | 1.0892         | 0.9055        | 814,387    |
| Detroit (Metropolitan) - 2000+         | 55.5   | 2.5  | 50.7     | 60.6     | 493    | 0.953      | 0.8689         | 1.0432         | 0.3065        | 888,225    |
| Hawaii - 2000+                         | 65.8   | 4.7  | 56.8     | 75.8     | 193    | 1.1297     | 0.9746         | 1.3027         | 0.105         | 293,328    |
| Iowa - 2000+                           | 53.7   | 2.9  | 48.3     | 59.7     | 352    | 0.9227     | 0.8274         | 1.0263         | 0.1424        | 654,962    |
| New Mexico - 2000+                     | 49.7#  | 3.4  | 43.3     | 56.9     | 213    | 0.8535     | 0.7417         | 0.9776         | 0.0212        | 428,492    |
| Seattle (Puget Sound) - 2000+          | 50.7#  | 2.2  | 46.4     | 55.2     | 510    | 0.8697     | 0.7942         | 0.9507         | 0.0018        | 1,006,814  |
| Utah - 2000+                           | 47.9#  | 3.4  | 41.5     | 54.9     | 204    | 0.8217     | 0.7118         | 0.9439         | 0.0048        | 426,272    |
| Atlanta (Metropolitan) - 2000+         | 55.9   | 2.9  | 50.3     | 61.9     | 366    | 0.9598     | 0.8624         | 1.0654         | 0.4583        | 654,716    |
| San Jose-Monterey - 2000+              | 51.3#  | 3.2  | 45.3     | 58       | 261    | 0.8814     | 0.7765         | 0.9966         | 0.0438        | 508,446    |
| Los Angeles - 2000+                    | 55.9   | 1.7  | 52.6     | 59.3     | 1,061  | 0.9593     | 0.8997         | 1.022          | 0.2018        | 1,899,032  |
| Alaska Natives - 2000+                 | 114.8# | 24.5 | 72       | 173.9    | 22     | 1.9718     | 1.2352         | 2.987          | 0.0054        | 19,156     |
| Rural Georgia - 2000+                  | 69     | 15.4 | 42.2     | 106.6    | 20     | 1.1855     | 0.7238         | 1.8319         | 0.5069        | 28,965     |
| California excluding SF/SJM/LA - 2000+ | 52.9#  | 1.2  | 50.7     | 55.2     | 2,112  | 0.9089     | 0.867          | 0.9526         | 0.0001        | 3,989,416  |
| Kentucky - 2000+                       | 78.1#  | 2.9  | 72.6     | 84       | 733    | 1.3417     | 1.2431         | 1.4462         | 0             | 938,014    |
| Louisiana - 2000+                      | 75.7#  | 2.8  | 70.2     | 81.5     | 708    | 1.3001     | 1.2031         | 1.4032         | 0             | 934,988    |
| New Jersey - 2000+                     | 56.4   | 1.7  | 53.1     | 59.8     | 1,091  | 0.9676     | 0.9083         | 1.0301         | 0.309         | 1,935,821  |
| Greater Georgia - 2000+                | 75.2#  | 2.5  | 70.4     | 80.2     | 915    | 1.2908     | 1.205          | 1.3812         | 0             | 1,217,115  |
|                                        |        |      |          |          |        |            |                |                |               |            |
| Age                                    | 55     | 55   | 55       | 55       | 55     | 55         | 55             | 55             | 55            | 55         |
|                                        | Rate   | SE   | Lower CI | Upper CI | Count  | Rate Ratio | Ratio Lower CI | Ratio Upper CI | Ratio P-Value | Pop        |
| SEER 18                                | 62.1   | 0.6  | 60.9     | 63.3     | 10,538 |            |                |                |               | 16,965,058 |
| San Francisco-Oakland SMSA - 2000+     | 54.1#  | 2.4  | 49.5     | 59.1     | 501    | 0.871      | 0.7948         | 0.9528         | 0.0022        | 925,989    |
| Connecticut - 2000+                    | 59.9   | 2.8  | 54.6     | 65.5     | 470    | 0.9636     | 0.8767         | 1.057          | 0.4465        | 785,260    |
| Detroit (Metropolitan) - 2000+         | 68.0#  | 2.8  | 62.6     | 73.7     | 582    | 1.0944     | 1.0051         | 1.1898         | 0.0379        | 856,126    |
| Hawaii - 2000+                         | 73.4#  | 5.1  | 63.8     | 84.1     | 210    | 1.1822     | 1.0263         | 1.3553         | 0.0206        | 285,976    |
| Iowa - 2000+                           | 62.7   | 3.1  | 56.7     | 69.2     | 398    | 1.0101     | 0.9116         | 1.1166         | 0.8575        | 634,307    |
| New Mexico - 2000+                     | 51.3#  | 3.5  | 44.7     | 58.7     | 213    | 0.8263     | 0.718          | 0.9464         | 0.0051        | 415,010    |
| Seattle (Puget Sound) - 2000+          | 52.6#  | 2.3  | 48.1     | 57.3     | 511    | 0.8462     | 0.7728         | 0.9249         | 0.0002        | 972,124    |
| Utah - 2000+                           | 45.7#  | 3.3  | 39.4     | 52.8     | 187    | 0.7364     | 0.6339         | 0.8511         | 0             | 408,787    |
| Atlanta (Metropolitan) - 2000+         | 67.4   | 3.3  | 61.1     | 74.2     | 421    | 1.0853     | 0.9822         | 1.1965         | 0.1076        | 624,500    |
| San Jose-Monterey - 2000+              | 55.7   | 3.4  | 49.3     | 62.7     | 271    | 0.8966     | 0.7918         | 1.0116         | 0.0776        | 486,572    |
| Los Angeles - 2000+                    | 56.3#  | 1.8  | 52.9     | 59.9     | 1,029  | 0.907      | 0.8499         | 0.967          | 0.0026        | 1,826,536  |
| Alaska Natives - 2000+                 | 127.6# | 26   | 81.8     | 189.9    | 24     | 2.0543     | 1.3156         | 3.0583         | 0.0021        | 18,808     |
| Rural Georgia - 2000+                  | 88.1   | 17.6 | 57       | 130      | 25     | 1.4178     | 0.9171         | 2.0941         | 0.1143        | 28,387     |
| California excluding SF/SJM/LA - 2000+ | 54.9#  | 1.2  | 52.6     | 57.3     | 2,108  | 0.8839     | 0.8432         | 0.9264         | 0             | 3,839,206  |
| Kentucky - 2000+                       | 85.7#  | 3.1  | 79.8     | 91.9     | 781    | 1.3795     | 1.2812         | 1.4837         | 0             | 911,424    |
| Louisiana - 2000+                      | 77.4#  | 2.9  | 71.8     | 83.4     | 700    | 1.2466     | 1.1532         | 1.3459         | 0             | 903,995    |
| New Jersey - 2000+                     | 66.0#  | 1.9  | 62.3     | 69.8     | 1,230  | 1.062      | 1.0003         | 1.1268         | 0.0487        | 1,864,489  |
| Greater Georgia - 2000+                | 74.5#  | 2.5  | 69.6     | 79.6     | 877    | 1.199      | 1.1179         | 1.2846         | 0             | 1,177,562  |

| Age                                    | 56     | 56   | 56       | 56       | 56     | 56         | 56             | 56             | 56            | 56         |
|----------------------------------------|--------|------|----------|----------|--------|------------|----------------|----------------|---------------|------------|
|                                        | Rate   | SE   | Lower CI | Upper CI | Count  | Rate Ratio | Ratio Lower CI | Ratio Upper CI | Ratio P-Value | Pop        |
| SEER 18                                | 66.4   | 0.6  | 65.2     | 67.7     | 10,903 |            |                |                |               | 16,416,007 |
| San Francisco-Oakland SMSA - 2000+     | 58.5#  | 2.6  | 53.6     | 63.7     | 523    | 0.8805     | 0.805          | 0.9613         | 0.0041        | 894,315    |
| Connecticut - 2000+                    | 61.8   | 2.8  | 56.3     | 67.6     | 470    | 0.9299     | 0.846          | 1.0199         | 0.1258        | 761,032    |
| Detroit (Metropolitan) - 2000+         | 66.7   | 2.8  | 61.3     | 72.5     | 553    | 1.0048     | 0.9208         | 1.0945         | 0.925         | 828,656    |
| Hawaii - 2000+                         | 85.6#  | 5.5  | 75.1     | 97.1     | 239    | 1.2885     | 1.1288         | 1.4648         | 0.0002        | 279,268    |
| Iowa - 2000+                           | 67.1   | 3.3  | 60.8     | 73.9     | 413    | 1.0103     | 0.9136         | 1.1147         | 0.8516        | 615,480    |
| New Mexico - 2000+                     | 60.5   | 3.9  | 53.2     | 68.6     | 246    | 0.9112     | 0.7998         | 1.034          | 0.1549        | 406,482    |
| Seattle (Puget Sound) - 2000+          | 54.2#  | 2.4  | 49.6     | 59.1     | 512    | 0.8158     | 0.7452         | 0.8915         | 0             | 944,900    |
| Utah - 2000+                           | 55.6#  | 3.7  | 48.5     | 63.5     | 221    | 0.8377     | 0.7299         | 0.9571         | 0.0083        | 397,203    |
| Atlanta (Metropolitan) - 2000+         | 64.7   | 3.3  | 58.4     | 71.5     | 385    | 0.9737     | 0.8773         | 1.0779         | 0.6293        | 595,341    |
| San Jose-Monterey - 2000+              | 49.1#  | 3.2  | 43       | 55.9     | 230    | 0.7394     | 0.646          | 0.8426         | 0             | 468,349    |
| Los Angeles - 2000+                    | 64     | 1.9  | 60.3     | 67.9     | 1,124  | 0.9637     | 0.9055         | 1.0248         | 0.2433        | 1,756,099  |
| Alaska Natives - 2000+                 | 186.3# | 32.4 | 128.2    | 261.6    | 33     | 2.8046     | 1.9296         | 3.9411         | 0             | 17,716     |
| Rural Georgia - 2000+                  | 91.3   | 17.9 | 59.6     | 133.7    | 26     | 1.3743     | 0.8974         | 2.0148         | 0.1413        | 28,484     |
| California excluding SF/SJM/LA - 2000+ | 59.6#  | 1.3  | 57.2     | 62.2     | 2,212  | 0.8981     | 0.8576         | 0.9402         | 0             | 3,708,422  |
| Kentucky - 2000+                       | 87.5#  | 3.1  | 81.4     | 93.8     | 777    | 1.3169     | 1.2229         | 1.4165         | 0             | 888,343    |
| Louisiana - 2000+                      | 82.0#  | 3.1  | 76.2     | 88.2     | 721    | 1.2351     | 1.1439         | 1.332          | 0             | 878,900    |
| New Jersey - 2000+                     | 71.5#  | 2    | 67.7     | 75.5     | 1,287  | 1.0769     | 1.0156         | 1.141          | 0.0132        | 1,799,448  |
| Greater Georgia - 2000+                | 81.1#  | 2.7  | 76       | 86.5     | 931    | 1.2215     | 1.1412         | 1.3062         | 0             | 1,147,569  |
|                                        |        |      |          |          |        |            |                |                |               |            |
| Age                                    | 57     | 57   | 57       | 57       | 57     | 57         | 57             | 57             | 57            | 57         |
|                                        | Rate   | SE   | Lower CI | Upper CI | Count  | Rate Ratio | Ratio Lower CI | Ratio Upper CI | Ratio P-Value | Pop        |
| SEER 18                                | 70.8   | 0.7  | 69.5     | 72.2     | 11,238 |            |                |                |               | 15,862,397 |
| San Francisco-Oakland SMSA - 2000+     | 65.6   | 2.8  | 60.3     | 71.3     | 567    | 0.9262     | 0.8498         | 1.0079         | 0.0761        | 864,064    |
| Connecticut - 2000+                    | 72.8   | 3.1  | 66.8     | 79.2     | 536    | 1.0274     | 0.9404         | 1.1205         | 0.5525        | 736,369    |
| Detroit (Metropolitan) - 2000+         | 72.2   | 3    | 66.4     | 78.3     | 578    | 1.0189     | 0.9356         | 1.1078         | 0.6727        | 800,723    |
| Hawaii - 2000+                         | 81.5#  | 5.5  | 71.2     | 93       | 223    | 1.1508     | 1.0034         | 1.314          | 0.0446        | 273,510    |
| Iowa - 2000+                           | 71.4   | 3.5  | 64.8     | 78.5     | 427    | 1.0082     | 0.9132         | 1.1105         | 0.8828        | 597,836    |
| New Mexico - 2000+                     | 60.7#  | 3.9  | 53.3     | 68.9     | 241    | 0.857      | 0.7512         | 0.9737         | 0.0169        | 396,943    |
| Seattle (Puget Sound) - 2000+          | 55.9#  | 2.5  | 51.1     | 60.9     | 511    | 0.7884     | 0.7201         | 0.8616         | 0             | 914,849    |
| Utah - 2000+                           | 55.4#  | 3.8  | 48.2     | 63.3     | 213    | 0.7813     | 0.6791         | 0.8948         | 0.0002        | 384,792    |
| Atlanta (Metropolitan) - 2000+         | 70     | 3.5  | 63.3     | 77.2     | 398    | 0.988      | 0.8918         | 1.092          | 0.8383        | 568,606    |
| San Jose-Monterey - 2000+              | 56.1#  | 3.5  | 49.3     | 63.4     | 252    | 0.7912     | 0.6955         | 0.8964         | 0.0002        | 449,589    |
| Los Angeles - 2000+                    | 67.8   | 2    | 63.9     | 71.9     | 1,140  | 0.9571     | 0.8998         | 1.0174         | 0.162         | 1,681,178  |
| Alaska Natives - 2000+                 | 77.6   | 21.5 | 41.3     | 132.7    | 13     | 1.0957     | 0.5832         | 1.8744         | 0.8174        | 16,747     |
| Rural Georgia - 2000+                  | 82.1   | 17.1 | 52.1     | 123.3    | 23     | 1.1594     | 0.7347         | 1.7406         | 0.5345        | 28,000     |
| California excluding SF/SJM/LA - 2000+ | 64.0#  | 1.3  | 61.4     | 66.7     | 2,293  | 0.9038     | 0.8638         | 0.9454         | 0             | 3,580,912  |
| Kentucky - 2000+                       | 91.8#  | 3.3  | 85.5     | 98.4     | 789    | 1.2952     | 1.2035         | 1.3923         | 0             | 859,857    |
| Louisiana - 2000+                      | 99.0#  | 3.4  | 92.4     | 105.9    | 840    | 1.3975     | 1.3014         | 1.4992         | 0             | 848,399    |
| New Jersey - 2000+                     | 72.4   | 2    | 68.4     | 76.5     | 1,262  | 1.0213     | 0.9628         | 1.0825         | 0.4868        | 1,744,240  |
| Greater Georgia - 2000+                | 83.5#  | 2.7  | 78.3     | 89.1     | 932    | 1.179      | 1.1016         | 1.2606         | 0             | 1,115,783  |

| Age                                    | 58     | 58   | 58       | 58       | 58     | 58         | 58             | 58             | 58            | 58         |
|----------------------------------------|--------|------|----------|----------|--------|------------|----------------|----------------|---------------|------------|
|                                        | Rate   | SE   | Lower CI | Upper CI | Count  | Rate Ratio | Ratio Lower CI | Ratio Upper CI | Ratio P-Value | Pop        |
| SEER 18                                | 75.6   | 0.7  | 74.2     | 77       | 11,525 |            |                |                |               | 15,244,402 |
| San Francisco-Oakland SMSA - 2000+     | 65.7#  | 2.8  | 60.3     | 71.4     | 544    | 0.8687     | 0.7956         | 0.9468         | 0.0012        | 828,339    |
| Connecticut - 2000+                    | 73.4   | 3.2  | 67.3     | 80       | 520    | 0.9713     | 0.8879         | 1.0606         | 0.5333        | 708,127    |
| Detroit (Metropolitan) - 2000+         | 80.9   | 3.2  | 74.7     | 87.5     | 622    | 1.0701     | 0.9856         | 1.1601         | 0.1064        | 768,842    |
| Hawaii - 2000+                         | 83.4   | 5.6  | 72.8     | 95.2     | 221    | 1.1037     | 0.9618         | 1.2609         | 0.1593        | 264,852    |
| Iowa - 2000+                           | 72.6   | 3.5  | 65.8     | 79.9     | 419    | 0.9602     | 0.8689         | 1.0586         | 0.4294        | 577,212    |
| New Mexico - 2000+                     | 70     | 4.3  | 61.8     | 78.8     | 269    | 0.9254     | 0.8169         | 1.0444         | 0.2175        | 384,510    |
| Seattle (Puget Sound) - 2000+          | 59.6#  | 2.6  | 54.6     | 64.9     | 524    | 0.788      | 0.7206         | 0.8602         | 0             | 879,536    |
| Utah - 2000+                           | 51.0#  | 3.7  | 43.9     | 58.8     | 188    | 0.6741     | 0.5805         | 0.7786         | 0             | 368,920    |
| Atlanta (Metropolitan) - 2000+         | 75.8   | 3.7  | 68.6     | 83.5     | 409    | 1.0023     | 0.906          | 1.1063         | 0.9775        | 539,755    |
| San Jose-Monterey - 2000+              | 62.8#  | 3.8  | 55.5     | 70.8     | 269    | 0.831      | 0.7336         | 0.9378         | 0.0023        | 428,192    |
| Los Angeles - 2000+                    | 74.1   | 2.1  | 70       | 78.5     | 1,195  | 0.9806     | 0.9232         | 1.0409         | 0.5316        | 1,611,851  |
| Alaska Natives - 2000+                 | 159.7# | 31.9 | 103.3    | 235.7    | 25     | 2.1123     | 1.3664         | 3.1198         | 0.0011        | 15,655     |
| Rural Georgia - 2000+                  | 73.6   | 16.4 | 44.9     | 113.6    | 20     | 0.9729     | 0.5941         | 1.5034         | 1             | 27,190     |
| California excluding SF/SJM/LA - 2000+ | 67.7#  | 1.4  | 65       | 70.6     | 2,325  | 0.8961     | 0.8567         | 0.9371         | 0             | 3,431,765  |
| Kentucky - 2000+                       | 92.8#  | 3.3  | 86.4     | 99.6     | 777    | 1.2281     | 1.1406         | 1.3208         | 0             | 836,869    |
| Louisiana - 2000+                      | 103.2# | 3.6  | 96.4     | 110.4    | 844    | 1.3655     | 1.2718         | 1.4645         | 0             | 817,573    |
| New Jersey - 2000+                     | 80.3#  | 2.2  | 76.1     | 84.7     | 1,345  | 1.0625     | 1.0034         | 1.1243         | 0.0378        | 1,674,412  |
| Greater Georgia - 2000+                | 93.4#  | 2.9  | 87.7     | 99.3     | 1,009  | 1.2349     | 1.1568         | 1.317          | 0             | 1,080,802  |
|                                        |        |      |          |          |        |            |                |                |               |            |
|                                        |        |      |          |          |        |            |                |                |               |            |
| Age                                    | 59     | 59   | 59       | 59       | 59     | 59         | 59             | 59             | 59            | 59         |
|                                        | Rate   | SE   | Lower CI | Upper CI | Count  | Rate Ratio | Ratio Lower CI | Ratio Upper CI | Ratio P-Value | Pop        |
| SEER 18                                | 82.3   | 0.8  | 80.8     | 83.8     | 11,991 |            |                |                |               | 14,571,936 |
| San Francisco-Oakland SMSA - 2000+     | 74.4#  | 3.1  | 68.5     | 80.6     | 587    | 0.9039     | 0.8306         | 0.982          | 0.0164        | 789,205    |
| Connecticut - 2000+                    | 76.1   | 3.4  | 69.7     | 83       | 514    | 0.9254     | 0.8455         | 1.0109         | 0.0866        | 675,014    |
| Detroit (Metropolitan) - 2000+         | 86.9   | 3.4  | 80.2     | 93.9     | 635    | 1.0557     | 0.9732         | 1.1436         | 0.1912        | 730,934    |
| Hawaii - 2000+                         | 99.7#  | 6.2  | 87.8     | 112.7    | 255    | 1.2114     | 1.0659         | 1.3715         | 0.0035        | 255,803    |
| Iowa - 2000+                           | 79.4   | 3.8  | 72.2     | 87.2     | 442    | 0.9651     | 0.8757         | 1.0613         | 0.4803        | 556,554    |
| New Mexico - 2000+                     | 67.0#  | 4.3  | 58.9     | 75.9     | 248    | 0.8139     | 0.7149         | 0.923          | 0.001         | 370,278    |
| Seattle (Puget Sound) - 2000+          | 69.4#  | 2.9  | 63.8     | 75.2     | 582    | 0.843      | 0.7744         | 0.9162         | 0             | 839,016    |
| Utah - 2000+                           | 64.5#  | 4.3  | 56.4     | 73.4     | 227    | 0.7837     | 0.6842         | 0.8937         | 0.0002        | 352,001    |
| Atlanta (Metropolitan) - 2000+         | 82.1   | 4    | 74.4     | 90.4     | 417    | 0.9978     | 0.9028         | 1.1002         | 0.9901        | 507,892    |
| San Jose-Monterey - 2000+              | 76.4   | 4.3  | 68.2     | 85.4     | 313    | 0.9288     | 0.8276         | 1.0392         | 0.2049        | 409,519    |
| Los Angeles - 2000+                    | 81.1   | 2.3  | 76.7     | 85.7     | 1,244  | 0.9857     | 0.9291         | 1.0451         | 0.6415        | 1,533,690  |
| Alaska Natives - 2000+                 | 128.1  | 29.4 | 77.2     | 200.1    | 19     | 1.5573     | 0.9372         | 2.4329         | 0.0858        | 14,827     |
| Rural Georgia - 2000+                  | 82.1   | 17.5 | 51.4     | 124.2    | 22     | 0.9972     | 0.6247         | 1.5106         | 1             | 26,809     |
| California excluding SF/SJM/LA - 2000+ | 73.8#  | 1.5  | 70.9     | 76.8     | 2,421  | 0.8966     | 0.858          | 0.9367         | 0             | 3,281,283  |
| Kentucky - 2000+                       | 105.4# | 3.6  | 98.4     | 112.7    | 849    | 1.281      | 1.1935         | 1.3735         | 0             | 805,425    |
| Louisiana - 2000+                      | 103.5# | 3.6  | 96.5     | 110.8    | 816    | 1.2576     | 1.1701         | 1.3502         | 0             | 788,505    |
| New Jersey - 2000+                     | 87.6#  | 2.3  | 83.1     | 92.3     | 1,400  | 1.0647     | 1.0067         | 1.1254         | 0.0284        | 1,597,920  |
| Greater Georgia - 2000+                | 96.4#  | 3    | 90.5     | 102.6    | 1,000  | 1.1716     | 1.0973         | 1.2498         | 0             | 1,037,261  |

| Age                                    | 60                                                                                                                         | 60   | 60       | 60       | 60     | 60         | 60             | 60             | 60            | 60         |
|----------------------------------------|----------------------------------------------------------------------------------------------------------------------------|------|----------|----------|--------|------------|----------------|----------------|---------------|------------|
|                                        | Rate                                                                                                                       | SE   | Lower CI | Upper CI | Count  | Rate Ratio | Ratio Lower CI | Ratio Upper CI | Ratio P-Value | Pop        |
| SEER 18                                | 89.8                                                                                                                       | 0.8  | 88.2     | 91.4     | 12,449 |            |                |                |               | 13,865,681 |
| San Francisco-Oakland SMSA - 2000+     | 76.6#                                                                                                                      | 3.2  | 70.5     | 83.2     | 577    | 0.8536     | 0.7839         | 0.928          | 0.0002        | 752,858    |
| Connecticut - 2000+                    | 86.5                                                                                                                       | 3.7  | 79.4     | 94       | 554    | 0.9629     | 0.8827         | 1.0485         | 0.3964        | 640,832    |
| Detroit (Metropolitan) - 2000+         | 91.3                                                                                                                       | 3.6  | 84.3     | 98.7     | 631    | 1.0168     | 0.9372         | 1.1016         | 0.6935        | 691,165    |
| Hawaii - 2000+                         | 103.1#                                                                                                                     | 6.5  | 90.8     | 116.6    | 253    | 1.1484     | 1.01           | 1.3007         | 0.0348        | 245,369    |
| Iowa - 2000+                           | 88.7                                                                                                                       | 4.1  | 80.8     | 97       | 473    | 0.9875     | 0.899          | 1.0826         | 0.8115        | 533,497    |
| New Mexico - 2000+                     | 83.7                                                                                                                       | 4.8  | 74.4     | 93.7     | 298    | 0.9319     | 0.828          | 1.0454         | 0.2386        | 356,163    |
| Seattle (Puget Sound) - 2000+          | 74.6#                                                                                                                      | 3.1  | 68.7     | 80.8     | 593    | 0.8308     | 0.7638         | 0.9022         | 0             | 794,976    |
| Utah - 2000+                           | 68.5#                                                                                                                      | 4.5  | 59.9     | 78       | 229    | 0.7628     | 0.6664         | 0.8693         | 0             | 334,388    |
| Atlanta (Metropolitan) - 2000+         | 86.4                                                                                                                       | 4.3  | 78.3     | 95.2     | 411    | 0.9625     | 0.8703         | 1.0619         | 0.4624        | 475,622    |
| San Jose-Monterey - 2000+              | 69.7#                                                                                                                      | 4.2  | 61.6     | 78.5     | 269    | 0.7763     | 0.6854         | 0.876          | 0             | 385,947    |
| Los Angeles - 2000+                    | 89.1                                                                                                                       | 2.5  | 84.3     | 94.1     | 1,293  | 0.9921     | 0.9362         | 1.0507         | 0.8011        | 1,451,557  |
| Alaska Natives - 2000+                 | 236.2#                                                                                                                     | 41.1 | 162.6    | 331.6    | 33     | 2.6303     | 1.8097         | 3.6959         | 0             | 13,974     |
| Rural Georgia - 2000+                  | 129.6                                                                                                                      | 22.2 | 89.8     | 181.1    | 34     | 1.4436     | 0.9993         | 2.0183         | 0.0505        | 26,233     |
| California excluding SF/SJM/LA - 2000+ | 79.8#                                                                                                                      | 1.6  | 76.7     | 83       | 2,491  | 0.8885     | 0.8508         | 0.9277         | 0             | 3,122,541  |
| Kentucky - 2000+                       | 122.6#                                                                                                                     | 4    | 114.9    | 130.6    | 948    | 1.3654     | 1.2768         | 1.4587         | 0             | 773,336    |
| Louisiana - 2000+                      | 114.8#                                                                                                                     | 3.9  | 107.2    | 122.7    | 862    | 1.2784     | 1.1917         | 1.3698         | 0             | 751,039    |
| New Jersey - 2000+                     | 94.7                                                                                                                       | 2.5  | 89.9     | 99.7     | 1,441  | 1.0545     | 0.9979         | 1.1137         | 0.0595        | 1,521,987  |
| Greater Georgia - 2000+                | 106.5#                                                                                                                     | 3.3  | 100.2    | 113.1    | 1,059  | 1.1864     | 1.1132         | 1.2633         | 0             | 994,197    |
|                                        | Rates are per 100,000 and age-adjusted to the 2000 US Std Population (single ages to 84 - Census P25-1130) standard.       |      |          |          |        |            |                |                |               |            |
|                                        | Confidence intervals are 95% for rates and ratios.                                                                         |      |          |          |        |            |                |                |               |            |
| #                                      | The rate ratio indicates that the rate is significantly different than the rate for SEER 18 (p<0.05).                      |      |          |          |        |            |                |                |               |            |
|                                        | Warning: Use caution when interpreting ratios and related statistics as the ratio variable contains overlapping groupings. |      |          |          |        |            |                |                |               |            |
| SEER                                   | The Surveillance, Epidemiology, and End Results (SEER) Program                                                             |      |          |          |        |            |                |                |               |            |
| ~                                      | Statistic could not be calculated.                                                                                         |      |          |          |        |            |                |                |               |            |
