# Supplementary material for: Geographic and intra‐racial disparities in early‐onset colorectal cancer in the SEER 18 registries of the United States
Source: PubMed Central journal article supplement (PMC7724480; doi:10.1002/cam4.3488), 2020-10-22
Supplement: CAM4-9-9150-s007.pdf [file CAM4-9-9150-s007.pdf]

Supplemental Spreadsheet 3. SEER 18 Registries Incidence Rates Stratified by Race in One Year Age Increments

| Age                     |                                        | 30   | 31   | 32   | 33   | 34   | 35   | 36   | 37   | 38    |
|-------------------------|----------------------------------------|------|------|------|------|------|------|------|------|-------|
|                         |                                        | Rate | Rate | Rate | Rate | Rate | Rate | Rate | Rate | Rate  |
| White                   | SEER 18                                | 2.8  | 3.4  | 3.9  | 5.1  | 5.2  | 6.1  | 6.7  | 7.3  | 8.9   |
|                         | San Francisco-Oakland SMSA - 2000+     | 2.3  | 1.8# | 3.6  | 4.2  | 5.1  | 4.2# | 7.2  | 6.6  | 9.8   |
|                         | Connecticut - 2000+                    | 2.9  | 2.9  | 3    | 4.9  | 5.8  | 7.2  | 6    | 7.2  | 8.4   |
|                         | Detroit (Metropolitan) - 2000+         | 3.6  | 3.6  | 3.4  | 5.9  | 6.9  | 5.8  | 5.4  | 5.8  | 8.7   |
|                         | Hawaii - 2000+                         | 1.2  | 5.3  | 0    | 5.4  | 5.6  | 12.3 | 2.8  | 8.4  | 14    |
|                         | Iowa - 2000+                           | 2.2  | 2.7  | 3.6  | 3.6  | 5.6  | 7.1  | 4.9  | 8.6  | 8.3   |
|                         | New Mexico - 2000+                     | 2.7  | 3.9  | 3.7  | 4.6  | 6.5  | 4    | 5.2  | 6.9  | 6.5   |
|                         | Seattle (Puget Sound) - 2000+          | 2.3  | 3.6  | 2.8  | 5.2  | 4.4  | 5.8  | 7.4  | 6    | 8.7   |
|                         | Utah - 2000+                           | 3.5  | 4.1  | 5.2  | 4.5  | 3.7  | 5.3  | 8.3  | 5.9  | 8.9   |
|                         | Atlanta (Metropolitan) - 2000+         | 0.9# | 4.3  | 3.6  | 5.4  | 4.3  | 5.4  | 5.4  | 8.8  | 8.3   |
|                         | San Jose-Monterey - 2000+              | 2.5  | 2.8  | 4.8  | 6.3  | 3.8  | 5.3  | 4.8  | 7.8  | 4.5#  |
|                         | Los Angeles - 2000+                    | 2.2  | 2.9  | 2.8# | 4.6  | 4.0# | 5.5  | 5.5  | 5.7# | 7.7   |
|                         | Alaska Natives - 2000+                 | ~    | ~    | ~    | ~    | ~    | ~    | ~    | ~    | ~     |
|                         | Rural Georgia - 2000+                  | 0    | 0    | 0    | 15.6 | 0    | 0    | 7.3  | 14.5 | 14    |
|                         | California excluding SF/SJM/LA - 2000+ | 2.9  | 3    | 3.9  | 4.8  | 5.1  | 5.9  | 6.9  | 6.8  | 8.2   |
|                         | Kentucky - 2000+                       | 4.4# | 4.3  | 6.7# | 7.1# | 7.0# | 8.2# | 9.1# | 9    | 12.2# |
|                         | Louisiana - 2000+                      | 2.8  | 4.7  | 4.4  | 6.3  | 7.5# | 8.7# | 7.9  | 9.5  | 10.7  |
|                         | New Jersey - 2000+                     | 3.2  | 4.1  | 3.8  | 5.2  | 5.1  | 6.5  | 6.4  | 8.5  | 10.3  |
| Greater Georgia - 2000+ | 3.3                                    | 4    | 4.5  | 5.9  | 5.6  | 6.3  | 8.1  | 9    | 10.5 |       |
| Black                   | SEER 18                                | 2.6  | 3.1  | 4.1  | 4.5  | 5.2  | 5.2  | 7.4  | 8.1  | 9.7   |
|                         | San Francisco-Oakland SMSA - 2000+     | 3.1  | 3.2  | 3.2  | 6.4  | 2.1  | 2.1  | 2.1  | 15   | 8.4   |
|                         | Connecticut - 2000+                    | 1.1  | 4.4  | 4.4  | 6.5  | 3.3  | 2.1  | 9.7  | 3.2  | 10.8  |
|                         | Detroit (Metropolitan) - 2000+         | 4.2  | 2.8  | 2.7  | 3.2  | 6.4  | 5    | 5.8  | 8.5  | 11.6  |
|                         | Hawaii - 2000+                         | 0    | 9.2  | 0    | 9.7  | 10.1 | 20.9 | 0    | 0    | 0     |
|                         | Iowa - 2000+                           | 0    | 0    | 0    | 4.8  | 0    | 4.9  | 0    | 20.3 | 5.4   |
|                         | New Mexico - 2000+                     | 0    | 0    | 0    | 0    | 9.1  | 0    | 0    | 9.1  | 19    |
|                         | Seattle (Puget Sound) - 2000+          | 0    | 6.4  | 4.8  | 1.6  | 8.2  | 3.2  | 8.3  | 1.7  | 3.4   |
|                         | Utah - 2000+                           | 0    | 0    | 0    | 0    | 0    | 0    | 12.9 | 13.2 | 0     |
|                         | Atlanta (Metropolitan) - 2000+         | 2.9  | 2.9  | 3.2  | 4.4  | 5.8  | 5.7  | 8.2  | 8.2  | 10.2  |
|                         | San Jose-Monterey - 2000+              | 0    | 0    | 0    | 0    | 5    | 9.8  | 5.1  | 15.3 | 5.1   |
|                         | Los Angeles - 2000+                    | 3.6  | 2.8  | 3.2  | 2.8  | 4.6  | 4.1  | 7.2  | 4.9  | 8.9   |
|                         | Alaska Natives - 2000+                 | ~    | ~    | ~    | ~    | ~    | ~    | ~    | ~    | ~     |
|                         | Rural Georgia - 2000+                  | 9.7  | 0    | 10.1 | 0    | 9.5  | 0    | 9.6  | 0    | 0     |
|                         | California excluding SF/SJM/LA - 2000+ | 1.8  | 2.6  | 3.7  | 4.5  | 1.9# | 3    | 6.9  | 7.9  | 8.3   |
|                         | Kentucky - 2000+                       | 5    | 1.3  | 3.9  | 7.8  | 7.8  | 4    | 7.9  | 8    | 5.4   |
|                         | Louisiana - 2000+                      | 2.9  | 3.6  | 5.9  | 3.3  | 4.4  | 8.3  | 7.5  | 9    | 14.9# |
|                         | New Jersey - 2000+                     | 1.3  | 3.4  | 3    | 5.3  | 6.9  | 5.2  | 8.3  | 8.9  | 7.6   |
| Greater Georgia - 2000+ | 2.4                                    | 3.4  | 6.6  | 6    | 6.3  | 6.9  | 8.3  | 8    | 9.7  |       |

|                         | Age                                    | 39    | 40    | 41    | 42    | 43    | 44    | 45    | 46    |
|-------------------------|----------------------------------------|-------|-------|-------|-------|-------|-------|-------|-------|
|                         |                                        | Rate  | Rate  | Rate  | Rate  | Rate  | Rate  | Rate  | Rate  |
| White                   | SEER 18                                | 10.1  | 11.5  | 13.1  | 14    | 16.5  | 18.4  | 21.2  | 24.5  |
|                         | San Francisco-Oakland SMSA - 2000+     | 8.4   | 10.6  | 11    | 13.4  | 16.5  | 20.3  | 19.4  | 22.2  |
|                         | Connecticut - 2000+                    | 12.7  | 12.4  | 11.2  | 14.2  | 17.4  | 19.8  | 21.7  | 24.9  |
|                         | Detroit (Metropolitan) - 2000+         | 10.5  | 13.1  | 10.9  | 16.5  | 14.4  | 15.7  | 20.4  | 23.3  |
|                         | Hawaii - 2000+                         | 9.5   | 11.8  | 14.9  | 19.1  | 19.9  | 19.7  | 23.1  | 21    |
|                         | Iowa - 2000+                           | 11.1  | 15.0# | 14.6  | 15.3  | 19.6  | 21.2  | 20.4  | 26.6  |
|                         | New Mexico - 2000+                     | 7.2   | 7.1#  | 12    | 10.5  | 13.3  | 17.1  | 23.1  | 23.8  |
|                         | Seattle (Puget Sound) - 2000+          | 8.6   | 9.5   | 10.4# | 13.9  | 13.8  | 17.9  | 19.8  | 18.9# |
|                         | Utah - 2000+                           | 11.1  | 10.8  | 12.4  | 13    | 14.7  | 14.1# | 19.3  | 23.3  |
|                         | Atlanta (Metropolitan) - 2000+         | 7.1#  | 13.8  | 13.5  | 17.1  | 15.2  | 15.6  | 19.7  | 22.9  |
|                         | San Jose-Monterey - 2000+              | 10.2  | 8.6   | 13.5  | 14.7  | 16.4  | 18.9  | 18.1  | 21.6  |
|                         | Los Angeles - 2000+                    | 9.1   | 9.2#  | 12.6  | 11.0# | 13.7# | 14.6# | 18.7# | 22.4  |
|                         | Alaska Natives - 2000+                 | ~     | ~     | ~     | ~     | ~     | ~     | ~     | ~     |
|                         | Rural Georgia - 2000+                  | 0     | 6.8   | 19.9  | 6.5   | 6.4   | 12.5  | 37.8  | 50.3  |
|                         | California excluding SF/SJM/LA - 2000+ | 9     | 11.1  | 12.1  | 12.6# | 15.0# | 16.8# | 19.1# | 22.6# |
|                         | Kentucky - 2000+                       | 13.0# | 15.4# | 17.1# | 19.6# | 23.3# | 25.4# | 30.0# | 31.6# |
|                         | Louisiana - 2000+                      | 14.9# | 12.4  | 14.9  | 15.1  | 20.3# | 19.9  | 22.9  | 30.8# |
|                         | New Jersey - 2000+                     | 10.3  | 11.6  | 13.7  | 14.2  | 18.1  | 20.1  | 22.9  | 26.7  |
| Greater Georgia - 2000+ | 12.4#                                  | 13.3  | 18.4# | 16.7# | 18.8  | 22.2# | 25.6# | 28.9# |       |
| Black                   | SEER 18                                | 11.3  | 14.9  | 14.1  | 16.3  | 20.6  | 21.9  | 26.7  | 31.1  |
|                         | San Francisco-Oakland SMSA - 2000+     | 9.4   | 12    | 11.3  | 9.2   | 17.1  | 16.3  | 15.9# | 33.7  |
|                         | Connecticut - 2000+                    | 13    | 16.1  | 14.9  | 12.8  | 24.5  | 11.9# | 23.2  | 24.9  |
|                         | Detroit (Metropolitan) - 2000+         | 8.1   | 14.2  | 12.7  | 19.6  | 21.3  | 22.1  | 25    | 30    |
|                         | Hawaii - 2000+                         | 12.3  | 12.3  | 25.3  | 14.7  | 30.2  | 0     | 69.3  | 18.1  |
|                         | Iowa - 2000+                           | 27    | 10.9  | 0     | 5.8   | 17.2  | 47.6  | 17.8  | 24.7  |
|                         | New Mexico - 2000+                     | 18.4  | 9.5   | 0     | 9.4   | 0     | 9.5   | 9.7   | 39.1  |
|                         | Seattle (Puget Sound) - 2000+          | 8.5   | 12    | 13.7  | 8.7   | 14    | 17.8  | 20.1  | 33.6  |
|                         | Utah - 2000+                           | 0     | 0     | 29    | 15.2  | 0     | 52    | 35.2  | 17.1  |
|                         | Atlanta (Metropolitan) - 2000+         | 10.3  | 16.4  | 14.9  | 14.7  | 23.5  | 24.7  | 29.1  | 34.9  |
|                         | San Jose-Monterey - 2000+              | 15.6  | 9.8   | 5     | 24.9  | 29.6  | 4.9   | 15.9  | 24.6  |
|                         | Los Angeles - 2000+                    | 13.7  | 13    | 11.2  | 16.6  | 20.7  | 22.2  | 24.8  | 31.9  |
|                         | Alaska Natives - 2000+                 | ~     | ~     | ~     | ~     | ~     | ~     | ~     | ~     |
|                         | Rural Georgia - 2000+                  | 27.4  | 36    | 8.6   | 26    | 17.1  | 66.3# | 33    | 49.2  |
|                         | California excluding SF/SJM/LA - 2000+ | 8.2   | 9.7#  | 9.3#  | 13.9  | 16.4  | 15.7# | 19.1# | 26.8  |
|                         | Kentucky - 2000+                       | 14.9  | 18.5  | 18.6  | 18.5  | 22.2  | 22.3  | 33.3  | 30.3  |
|                         | Louisiana - 2000+                      | 13.2  | 20.7# | 18.3  | 18.5  | 19.9  | 26.2  | 31    | 30.9  |
|                         | New Jersey - 2000+                     | 8.8   | 15.3  | 16.1  | 15.6  | 19.8  | 19.5  | 24.7  | 26.6  |
| Greater Georgia - 2000+ | 14                                     | 14.2  | 15.5  | 19.8  | 23.2  | 25.6  | 34.7# | 36.1  |       |

|                         | Age                                    | 47    | 48    | 49    | 50     | 51    | 52    | 53    | 54    |
|-------------------------|----------------------------------------|-------|-------|-------|--------|-------|-------|-------|-------|
|                         |                                        | Rate  | Rate  | Rate  | Rate   | Rate  | Rate  | Rate  | Rate  |
| White                   | SEER 18                                | 26.6  | 30.5  | 34    | 49.7   | 49.6  | 48.8  | 51.2  | 56.2  |
|                         | San Francisco-Oakland SMSA - 2000+     | 23.2  | 26.1# | 31.8  | 50.2   | 49.9  | 45.8  | 44.7# | 51.7  |
|                         | Connecticut - 2000+                    | 26.1  | 31.3  | 33.9  | 61.7#  | 55.2# | 47.6  | 50.4  | 55.1  |
|                         | Detroit (Metropolitan) - 2000+         | 28.1  | 31.4  | 31.2  | 45.3   | 42.9# | 47.7  | 49.5  | 50.6  |
|                         | Hawaii - 2000+                         | 21.1  | 43.2  | 44.3  | 62.5   | 72.4# | 49.1  | 54.8  | 64.1  |
|                         | Iowa - 2000+                           | 29    | 31.2  | 32.8  | 56.0#  | 53.9  | 48    | 51.4  | 53.8  |
|                         | New Mexico - 2000+                     | 18.0# | 30.8  | 28.5  | 36.6#  | 47.8  | 44.8  | 52.5  | 49.5  |
|                         | Seattle (Puget Sound) - 2000+          | 26.4  | 26.6# | 29.5# | 45.9   | 42.3# | 41.7# | 43.5# | 50.7# |
|                         | Utah - 2000+                           | 23.7  | 25.0# | 26.1# | 50.7   | 47.1  | 46.3  | 46.7  | 48.2# |
|                         | Atlanta (Metropolitan) - 2000+         | 25.2  | 30.2  | 31.5  | 44.4   | 45.7  | 43.5  | 45.2  | 51.1  |
|                         | San Jose-Monterey - 2000+              | 24.5  | 30.7  | 32.9  | 54.3   | 48.8  | 50.4  | 49.2  | 53    |
|                         | Los Angeles - 2000+                    | 24.1  | 25.9# | 29.7# | 45.8#  | 44.8# | 45.7  | 46.9# | 52.2  |
|                         | Alaska Natives - 2000+                 | ~     | ~     | ~     | ~      | ~     | ~     | ~     | ~     |
|                         | Rural Georgia - 2000+                  | 18.7  | 24    | 47.5  | 29.3   | 35    | 40.8  | 72.9  | 50.8  |
|                         | California excluding SF/SJM/LA - 2000+ | 24.4# | 28.3# | 32.7  | 43.9#  | 46.7# | 44.5# | 47.1# | 52.0# |
|                         | Kentucky - 2000+                       | 35.7# | 38.6# | 45.8# | 61.9#  | 63.0# | 65.4# | 65.4# | 77.1# |
|                         | Louisiana - 2000+                      | 35.6# | 40.3# | 43.2# | 54.7   | 56.8# | 59.6# | 61.0# | 69.3# |
|                         | New Jersey - 2000+                     | 27.7  | 32.9  | 35    | 50.1   | 49.3  | 52.1  | 54.7  | 57.4  |
| Greater Georgia - 2000+ | 30.1#                                  | 34.8# | 40.9# | 58.9# | 56.5#  | 56.3# | 63.2# | 70.5# |       |
| Black                   | SEER 18                                | 32.7  | 37.4  | 41.9  | 61.7   | 65.5  | 64.9  | 73.9  | 76.6  |
|                         | San Francisco-Oakland SMSA - 2000+     | 31.5  | 33.1  | 40.2  | 64.1   | 52.3  | 58.2  | 57.4  | 76.6  |
|                         | Connecticut - 2000+                    | 28.7  | 22.6# | 38.3  | 64.7   | 79.3  | 59.8  | 82.9  | 76.7  |
|                         | Detroit (Metropolitan) - 2000+         | 32.6  | 40.3  | 46.2  | 62.8   | 71.7  | 67.2  | 66.9  | 74.2  |
|                         | Hawaii - 2000+                         | 0     | 54.8  | 20.2  | 38.8   | 21.5  | 22.7  | 0     | 73.5  |
|                         | Iowa - 2000+                           | 51    | 58.3  | 45.6  | 39.5   | 56.2  | 86.7  | 90.9  | 40.4  |
|                         | New Mexico - 2000+                     | 49.2  | 28.5  | 10    | 10.2#  | 31.8  | 51.1  | 55    | 33.7  |
|                         | Seattle (Puget Sound) - 2000+          | 39.5  | 39.3  | 31.8  | 53.4   | 48.8  | 61.5  | 74.7  | 59.1  |
|                         | Utah - 2000+                           | 18.1  | 38.3  | 0     | 39.9   | 40.6  | 45.8  | 167.2 | 71.9  |
|                         | Atlanta (Metropolitan) - 2000+         | 26.3  | 32.5  | 35.5  | 59.7   | 62.8  | 64.7  | 65.3  | 64.7  |
|                         | San Jose-Monterey - 2000+              | 16.1  | 53    | 33    | 72.7   | 39.4  | 30.5  | 90.9  | 77    |
|                         | Los Angeles - 2000+                    | 35.9  | 27.9# | 34.8  | 62     | 55.5  | 70.6  | 65.1  | 81.2  |
|                         | Alaska Natives - 2000+                 | ~     | ~     | ~     | ~      | ~     | ~     | ~     | ~     |
|                         | Rural Georgia - 2000+                  | 66.3  | 32.8  | 97.5# | 126.0# | 85.1  | 86.3  | 114.7 | 99.6  |
|                         | California excluding SF/SJM/LA - 2000+ | 27.5  | 33.9  | 32.6# | 56.9   | 67.4  | 44.9# | 62.2  | 66.6  |
|                         | Kentucky - 2000+                       | 27.9  | 47.5  | 55.3  | 53.9   | 76.8  | 71.9  | 71    | 90.4  |
|                         | Louisiana - 2000+                      | 41.5# | 44.5  | 58.9# | 71     | 75.2  | 82.4# | 88.2# | 92.0# |
|                         | New Jersey - 2000+                     | 30.4  | 37    | 35.2  | 56     | 52.7# | 57.7  | 72.9  | 61.2# |
| Greater Georgia - 2000+ | 34.7                                   | 43.6  | 47    | 64.7  | 75     | 67.8  | 88.2# | 92.0# |       |

|                         | Age                                    | 55     | 56     | 57     | 58     | 59     | 60     |
|-------------------------|----------------------------------------|--------|--------|--------|--------|--------|--------|
|                         |                                        | Rate   | Rate   | Rate   | Rate   | Rate   | Rate   |
| White                   | SEER 18                                | 60.2   | 63.5   | 68.1   | 73.1   | 79.4   | 87.6   |
|                         | San Francisco-Oakland SMSA - 2000+     | 52.3#  | 53.5#  | 60.2#  | 62.0#  | 69.0#  | 74.9#  |
|                         | Connecticut - 2000+                    | 58.3   | 60.5   | 72.7   | 72.3   | 73.4   | 84.6   |
|                         | Detroit (Metropolitan) - 2000+         | 62.6   | 59.8   | 65.9   | 70.1   | 78.6   | 84.5   |
|                         | Hawaii - 2000+                         | 75.5   | 82.0#  | 80.2   | 70.1   | 87     | 93.1   |
|                         | Iowa - 2000+                           | 63.1   | 67.6   | 70.6   | 71.4   | 79.8   | 87.6   |
|                         | New Mexico - 2000+                     | 53.6   | 60.6   | 61.2   | 71.2   | 67.6#  | 85.7   |
|                         | Seattle (Puget Sound) - 2000+          | 51.5#  | 52.8#  | 55.5#  | 59.0#  | 67.8#  | 73.9#  |
|                         | Utah - 2000+                           | 45.1#  | 56.7   | 55.6#  | 51.8#  | 64.2#  | 70.2#  |
|                         | Atlanta (Metropolitan) - 2000+         | 57     | 56.7   | 62.2   | 67.2   | 70.1   | 77.4   |
|                         | San Jose-Monterey - 2000+              | 54.6   | 48.3#  | 52.8#  | 63.6   | 77.9   | 65.1#  |
|                         | Los Angeles - 2000+                    | 55.8#  | 59.8   | 62.0#  | 72.4   | 78.2   | 86     |
|                         | Alaska Natives - 2000+                 | ~      | ~      | ~      | ~      | ~      | ~      |
|                         | Rural Georgia - 2000+                  | 90     | 50.3   | 61.4   | 63     | 56.6   | 120.2  |
|                         | California excluding SF/SJM/LA - 2000+ | 54.5#  | 58.6#  | 63.5#  | 67.4#  | 73.3#  | 80.7#  |
|                         | Kentucky - 2000+                       | 84.3#  | 85.2#  | 90.7#  | 91.3#  | 103.9# | 121.4# |
|                         | Louisiana - 2000+                      | 70.9#  | 73.6#  | 91.6#  | 92.3#  | 96.5#  | 104.8# |
|                         | New Jersey - 2000+                     | 65.0#  | 71.6#  | 71.6   | 81.9#  | 88.5#  | 95.1#  |
| Greater Georgia - 2000+ | 71.6#                                  | 76.1#  | 78.9#  | 90.1#  | 90.3#  | 102.1# |        |
| Black                   | SEER 18                                | 81.6   | 89.3   | 95.4   | 102.2  | 111.6  | 116.9  |
|                         | San Francisco-Oakland SMSA - 2000+     | 53.2#  | 63.1#  | 89.2   | 82.1   | 110.6  | 108.3  |
|                         | Connecticut - 2000+                    | 70.6   | 69.1   | 82.5   | 98.6   | 101.8  | 82.3#  |
|                         | Detroit (Metropolitan) - 2000+         | 84.4   | 94.2   | 98.9   | 115.3  | 117.3  | 116.2  |
|                         | Hawaii - 2000+                         | 138.5  | 89.4   | 64.1   | 31.3   | 74.7   | 39.7   |
|                         | Iowa - 2000+                           | 76.7   | 36.4   | 77.7   | 140.2  | 66.3   | 144.1  |
|                         | New Mexico - 2000+                     | 24.4   | 38.4   | 51.3   | 81.5   | 29.3#  | 32.0#  |
|                         | Seattle (Puget Sound) - 2000+          | 76.3   | 75.8   | 85.8   | 70.1   | 105.6  | 60.8#  |
|                         | Utah - 2000+                           | 25.8   | 0      | 0      | 68.2   | 73.6   | 0      |
|                         | Atlanta (Metropolitan) - 2000+         | 86.8   | 79.7   | 85.9   | 94.6   | 106.5  | 111    |
|                         | San Jose-Monterey - 2000+              | 89.7   | 49.7   | 99.8   | 75.1   | 107.1  | 96     |
|                         | Los Angeles - 2000+                    | 72.4   | 97.1   | 95     | 96     | 104.6  | 122.8  |
|                         | Alaska Natives - 2000+                 | ~      | ~      | ~      | ~      | ~      | ~      |
|                         | Rural Georgia - 2000+                  | 76.6   | 163.5# | 121.2  | 94     | 133.4  | 151.1  |
|                         | California excluding SF/SJM/LA - 2000+ | 66.1#  | 75     | 75.5#  | 88.5   | 101.9  | 97.3#  |
|                         | Kentucky - 2000+                       | 106.9# | 112.5  | 105.2  | 115.6  | 131.7  | 144.5  |
|                         | Louisiana - 2000+                      | 95.7#  | 106.4# | 121.9# | 133.8# | 123.9  | 145.5# |
|                         | New Jersey - 2000+                     | 82.8   | 84     | 89.3   | 85.5#  | 101.9  | 105.8  |
| Greater Georgia - 2000+ | 86.7                                   | 100.1  | 100.4  | 107.2  | 123.1  | 128.9  |        |

|      |                                                                                                                            |
|------|----------------------------------------------------------------------------------------------------------------------------|
|      |                                                                                                                            |
|      | Rates are per 100,000 and age-adjusted to the 2000 US Std Population (single ages to 84 - Census P25-1130) standard.       |
|      | Confidence intervals are 95% for rates and ratios.                                                                         |
| #    | The rate ratio indicates that the rate is significantly different than the rate for SEER 18 ( $p < 0.05$ ).                |
|      | Warning: Use caution when interpreting ratios and related statistics as the ratio variable contains overlapping groupings. |
| SEER | The Surveillance, Epidemiology, and End Results (SEER) Program                                                             |
| ~    | Statistic could not be calculated.                                                                                         |
